# Supplementary material for: Investigation of the summer 2018 European ozone air pollution episodes using novel satellite data and modelling
Source: Copernicus journal article supplement (doi:10.5194/acp-23-13235-2023), 2023-10-19
Supplement: Supplementary file 1 [file acp-23-13235-2023-supplement.pdf]

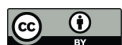

*Supplement of*

## **Investigation of the summer 2018 European ozone air pollution episodes using novel satellite data and modelling**

**Richard J. Pope et al.**

*Correspondence to:* Richard J. Pope ([r.j.pope@leeds.ac.uk](mailto:r.j.pope@leeds.ac.uk))

The copyright of individual parts of the supplement might differ from the article licence.

## 1 Supplement

3  
4  
5

### 6 **Supplementary Material (SM) 1 – Satellite Ozone Averaging Kernels**

7 This work has used satellite sub-column tropospheric ozone ( $SCO_3$ , surface – 450 hPa) data produced  
8 by RAL from the Global Ozone Monitoring Experiment – 2 (GOME-2) and by their extended Infrared  
9 and Microwave Sounding (IMS) scheme applied to IASI, MHS and AMSU on MetOp-A. For each of  
10 these products, **Figure S1** shows averaging kernels (AKs) for the 1<sup>st</sup> June 2017 and 2018 averaged  
11 over the European domain. The AK shows the sensitivity of the retrieved profile at different levels to  
12 a perturbation in the true profile at different levels (Rodgers, 2000; Eskes and Boersma, 2003).  
13 Therefore, it represents the instrument's vertical sensitivity to retrieving ozone. For both GOME-2  
14 and IMS, AK shapes show that retrieval levels at lower altitudes have sensitivity to troposphere  
15 ozone. The degree of freedom of signal (DOFS) for  $SCO_3$  for GOME-2 is 0.45 while IMS ranges  
16 between 0.62 and 0.65. Therefore, there is good information in these products on  $SCO_3$ , which  
17 remains similar between the two years, so we are justified in using these  $SCO_3$  products in this study.

### 18 **Supplementary Material (SM) 2 – Ozone Precursor Gases**

19 The enhancements in tropospheric ozone ( $O_3$ ) in the summer of 2018 across Europe, as presented in  
20 the main manuscript, are likely to be driven by a combination of factors because tropospheric  $O_3$   
21 distributions are influenced by precursor emissions, meteorological conditions, deposition,  
22 stratospheric intrusion and atmospheric chemistry. Therefore, we explore how several precursor  
23 gases methanol ( $CH_3OH$ ), nitrogen dioxide ( $NO_2$ ) and carbon monoxide ( $CO$ ), which also can be  
24 observed by satellite, compare between the summers of 2017 and 2018. **Figure S2** compares total  
25 column  $CH_3OH$  ( $TCCH_3OH$ ) amounts for May to August in 2017 and 2018 retrieved by RAL's extended  
26 IMS scheme applied to MetOp-A data from IASI, MHS and AMSU. In 2017, the peak column values  
27 occur in July ( $10.0-15.0 \times 10^{15}$  molecules/cm<sup>2</sup> over land and  $0.0-5.0 \times 10^{15}$  molecules/cm<sup>2</sup> over the sea)  
28 and are minimum in May ( $5.0-10.0 \times 10^{15}$  molecules/cm<sup>2</sup> over land and  $0.0-2.0 \times 10^{15}$  molecules/cm<sup>2</sup>  
29 over the sea). Note, the IMS scheme can exhibit a negative bias in background regions where  $CH_3OH$   
30 concentrations are particularly low and below the detection limit of IASI, as shown by Pope et al.,  
31 (2021). This bias has not been corrected for here. In 2018,  $TCCH_3OH$  values are larger than in 2017  
32 and peak in July at  $12.0-15.0 \times 10^{15}$  molecules/cm<sup>2</sup> over land and  $3.0-8.0 \times 10^{15}$  molecules/cm<sup>2</sup> over  
33 the sea) and are minimum in May at  $5.0-10.0 \times 10^{15}$  molecules/cm<sup>2</sup> over land and  $1.0-5.0 \times 10^{15}$   
34 molecules/cm<sup>2</sup> over the sea. The  $TCCH_3OH$  differences (**Figure S2 right column**) between the two  
35 years are positive over extensive areas, peaking at  $5.0-10.0 \times 10^{15}$  molecules/cm<sup>2</sup> in May over  
36 northern Europe and Scandinavia, which correlates strongly with IMS co-retrieved surface  
37 temperature differences (**Figure 1** in the main manuscript). Throughout June to August, the  
38 enhancements are lower between  $2.0-5.0 \times 10^{15}$  molecules/cm<sup>2</sup> across continental Europe.

39 Investigation of GOME-2 tropospheric column  $NO_2$  ( $TCNO_2$  – near-real-time level-2 product obtained  
40 from EUMETSAT at [https://acsaf.org/nrt\\_access.php](https://acsaf.org/nrt_access.php)), **Figure S3**, shows peaks values over source  
41 regions of  $5.0-10.0 \times 10^{15}$  molecules/cm<sup>2</sup>, which is consistent in most months and years. Background  
42  $TCNO_2$  ranges between  $0.0$  and  $2.0 \times 10^{15}$  molecules/cm<sup>2</sup>. Between 2017 and 2018, there are

43 enhancements over extensive areas;  $1.0\text{-}3.0 \times 10^{15}$  molecules/cm<sup>2</sup> in May and July over central  
44 Europe. Total column CO (TCCO) retrieved by IMS (**Figure S4**) peaks in May ranging between 57.0-  
45 63.0 DU over the ocean and typically 55.0-60.0 DU over continental Europe. In June and July, there is  
46 a decrease in TCCO with values ranging between 52.0 DU and 57.0 DU over the ocean and 50.0 DU  
47 to 55.0 DU over land. In August, there is an increase in TCCO with ocean values between 58.0 DU to  
48 62.0 DU in 2017 and a peak to 65.0 DU in 2018. Over continental Europe, TCCO ranges between 45.0  
49 DU and 60.0 in 2017 and 50.0 to 63.0 DU in 2018. In May and June, the difference panels (**right**  
50 **column of Figure S4**) show broad enhancements to TCCO in 2018 of 2.0 to 6.0 DU. In July, there is  
51 little difference between 2017 and 2018, while in August the largest 2018 TCCO enhancements are  
52 observed between 2.0 DU to 7.0 DU over most of continental Europe but with peak values  
53 (approximately 7.0-8.0 DU) over the central Mediterranean.

54 To summarize, examination of several ozone precursors which were retrieved together with ozone  
55 from Metop-A measurements all show enhancements over Europe in the summer of 2018 compared  
56 to 2017. CH<sub>3</sub>OH is directly influenced by the observed surface temperature enhancements  
57 correlated with biogenic activity and emissions. NO<sub>2</sub> enhancements are generally small in scale with  
58 the largest contained to central Europe in May and July, while CO appears to be broadly enhanced  
59 across the domain in most of the summer months. While there is observational evidence of  
60 enhancements to precursor gases, and hence potentially O<sub>3</sub>, we need to use a detailed atmospheric  
61 chemistry transport model (TOMCAT in this study) to investigate the scale of the O<sub>3</sub> enhancements  
62 and the processes involved.

### 63 **SM 3 – Total Column Ozone**

64 The differences in total column O<sub>3</sub> (TCO<sub>3</sub>) between 2017 and 2018 for GOME-2 and IMS retrievals are  
65 shown in **Figures S5** and **S6**, respectively, and are consistent. In June, July and August, both  
66 instruments show positive differences of approximately 5.0-20.0 DU across continental Europe. In  
67 July and August (and June to a lesser extent), there are negative differences (-30.0 to -10.0 DU)  
68 across the UK, North Sea and Scandinavia. In May, there appears to be an East-West positive-  
69 negative dipole in TCO<sub>3</sub> across Europe. Several of the spatial features in the TCO<sub>3</sub> 2018-2017  
70 difference plots are consistent with the differences in SCO<sub>3</sub> (i.e. **Figures 3** and **4** in the main  
71 manuscript). For instance, in June (May), there are negative (positive) TCO<sub>3</sub> differences of <-30.0 DU  
72 (>50.0 DU) between the UK and Iceland with corresponding negative (positive) SCO<sub>3</sub> differences of -  
73 5.0 to 0.0 DU (2.0-5.0 DU). For GOME-2, the SCO<sub>3</sub> and TCO<sub>3</sub> spatial differences are positively  
74 correlated with values in May, June, July and August of 0.56, 0.59, 0.58 and 0.57, respectively. For  
75 IMS, the corresponding correlations in May, June, July and August were 0.60, 0.65, 0.29 and 0.54.

### 76 **SM 4 – TOMCAT Biogenic Emissions**

77 As shown by IMS retrieved surface temperature data (**Figure 1** of the main manuscript), there were  
78 substantial enhancements in May and July between 2017 and 2018 (i.e. enhancements of 3.0-8.0 K  
79 over central continental Europe and >10.0 K over Scandinavia). Higher surface temperature can  
80 increase emissions of precursor biogenic gases. Higher air temperatures can also promote chemical  
81 formation of O<sub>3</sub> and summer-time heat-waves are often associated with blocking events leading to  
82 atmospheric stability favourable for O<sub>3</sub> formation e.g. Pope et al., (2016). The latter two are  
83 accounted for automatically in TOMCAT given its detailed tropospheric chemistry scheme and  
84 prescribed reanalysis meteorological fields. However, the increase in biogenic emissions resulting

85 from surface temperature enhancements is not represented in the standard climatological biogenic  
86 volatile organic (BVOC) emissions from the Chemistry-Climate Model Initiative (CCMI) used in  
87 TOMCAT (see Pope et al., (2020)). Therefore, we have used BVOC emissions for acetone, methanol,  
88 isoprene and monoterpenes from Jules (the Joint UK Land Environment Simulator) land surface  
89 model (Pacifico et al., 2011; Best et al., 2011; Clark et al., 2011) provided by the Centre for Ecology  
90 and Hydrology (CEH). Jules meteorological inputs came from ECMWF ERA-Interim, as for TOMCAT,  
91 the model setup used 9 plant function types and was driven by the TRIFFID global vegetation model  
92 (Zhang et al., 2015). However, the other BVOC emissions (e.g. formaldehyde, HCHO) came from  
93 CCMI as used in Pope et al., (2020).

94 **Figure S7** shows the combined TOMCAT input emissions (in  $\mu\text{g}/\text{m}^2/\text{s}$  of C) from Jules for acetone,  
95 methanol, isoprene and monoterpenes in 2017 and 2018. In 2017, between May and August, the  
96 peak emissions are over central and eastern Europe ranging between approximately 0.35 and  $>0.5$   
97  $\mu\text{g}/\text{m}^2/\text{s}$ . Over Scandinavia, the BVOC emissions peak in July between approximately 0.3 and 0.4  
98  $\mu\text{g}/\text{m}^2/\text{s}$ . Between 2017 and 2018, the BVOC emissions have similar rates except for Scandinavia  
99 where the emissions are  $>0.4$   $\mu\text{g}/\text{m}^2/\text{s}$  over a larger area. The difference panels (**Figure S7 right**  
100 **column**) show that broadly across Europe between May and August, the BVOC emissions are larger  
101 by 0.0-0.1  $\mu\text{g}/\text{m}^2/\text{s}$  in 2018. In June, around the Alps and parts of eastern Europe, there are negative  
102 differences of -0.1  $\mu\text{g}/\text{m}^2/\text{s}$  to -0.05  $\mu\text{g}/\text{m}^2/\text{s}$  due to larger 2017 BVOC emissions. The largest  
103 differences therefore are over Scandinavia, especially May and July (and June to lesser extent),  
104 where the BVOC emissions are larger by 0.2  $\mu\text{g}/\text{m}^2/\text{s}$  to  $>0.25$   $\mu\text{g}/\text{m}^2/\text{s}$ . This matches the spatial  
105 pattern in inter-year differences in  $\text{TCCH}_3\text{OH}$  (**Figure S2**) retrieved by IMS providing confidence in the  
106 spatial distribution of the BVOC emissions.

107 It should be noted though that the annual global emission total for Jules was lower than expected  
108 (i.e. 284.0 Tg of C in 2017) when compared with CCMI isoprene emissions (461.0 Tg of C). Therefore,  
109 we decided to scale up Jules isoprene emissions in 2017 and 2018 by the same factor. As we were  
110 interested in Europe, a relatively small area of the globe, we performed the scaling in  $60^\circ$  longitude  
111 and latitude bins to retain more accurate regional budgets than just scaling everything uniformly  
112 globally. For consistency, though the annual totals were more comparable for the other species, the  
113 same methodology was applied to acetone, methanol and monoterpenes as well.

#### 114 **SM 5 – TOMCAT Evaluation**

115 To evaluate the ability of TOMCAT to simulate the observed tropospheric  $\text{O}_3$  behaviour, we used the  
116 GOME-2 and IMS satellite datasets and the EMEP surface sites. **Figure S8a & b** shows that over  
117 Europe, TOMCAT is able to reproduce the broad surface  $\text{O}_3$  enhancement seen in May-June-July-  
118 August (MJJA) 2018 when compared with 2017. The EMEP sites show positive differences between  
119 2.0 ppbv and  $>10.0$  ppbv across Europe, peaking over central Europe with the smallest  
120 enhancements at the higher European latitudes (e.g. Scotland & Scandinavia). In comparison,  
121 TOMCAT is able to simulate the spatial pattern of the MJJA 2018 surface  $\text{O}_3$  enhancement, but the  
122 magnitude of the difference is smaller between 1.0 ppbv and 5.0 ppbv. Over eastern Europe though,  
123 TOMCAT simulates near-zero differences whereas EMEP shows enhancements between 2.0 ppbv  
124 and 5.0 ppbv. The modelled enhancements are potentially lower than that in EMEP due, in part, to  
125 the moderate overestimation of TOMCAT surface ozone in July and August in 2017. A similar  
126 relationship is found between TOMCAT and the satellite observations, discussed later. In terms of  
127 the absolute magnitude, TOMCAT does a reasonable job reproducing the seasonal cycle and

128 monthly mean surface O<sub>3</sub> values over Europe in 2017 and 2018 (i.e. TOMCAT grid boxes are co-  
129 located to EMEP sites and then used to derive the seasonal cycles – **Figures S8c & d**). In 2017, EMEP  
130 surface O<sub>3</sub> peaks at approximately 36.0-38.0 ppbv in April and May. However, TOMCAT, while  
131 simulating similar peak values, peaks several months later in May/June, and the subsequent drop off  
132 in values is less pronounced in the observations. In all months, except for December 2017, TOMCAT  
133 and EMEP monthly ranges (mean ± standard deviation) overlap showing that the model can simulate  
134 surface O<sub>3</sub> values observed by EMEP. Overall, the two seasonal cycles are reasonably well correlated  
135 (0.80) and the mean bias is low (-1.2 ppbv) and sits within the observational error (i.e. standard error  
136 with the autocorrelation accounted for of 3.79 ppbv). The RMSE is 3.84 ppbv and sits just outside the  
137 uncertainty range. In 2018, the model simulations only go until September and in the summer the  
138 model captures the absolute values and evolution of the observational seasonal cycle. However, in  
139 the winter and spring months, the model underestimates by 5.0-10.0 ppbv (similar in 2017 but lower  
140 differences of 0.0-5.0 ppbv). The correlation is 0.98 and both the mean bias and RMSE sit within the  
141 observational uncertainty. Therefore, TOMCAT simulates the absolute values and seasonality of the  
142 surface observations reasonably well and, although simulating smaller absolute 2018 enhancement,  
143 successfully captures the spatial distribution.

144 Given the relatively coarse resolution of TOMCAT, we compared the TOMCAT summer (1<sup>st</sup> May – 31<sup>st</sup>  
145 August 2018) simulation with higher resolution model data of surface ozone from the Copernicus  
146 Atmosphere Monitoring Service (CAMS). This involved two CAMS products including the global  
147 reanalysis product (available from <https://ads.atmosphere.copernicus.eu/> and described by Wagner  
148 et al., (2021)) and the regional CAMS product for Europe (available from  
149 <https://atmosphere.copernicus.eu/regional-services>). Note, we used the ensemble reanalysis  
150 product which was an ensemble average of all the regional models involved in the CAMS regional  
151 programme. Here, CAMS global and CAMS regional had original spatial resolutions of 0.75°×0.75°  
152 and 0.1°×0.1° and were interpolated onto the TOMCAT spatial resolution for statistical comparison.

153 **Figure S9a-c** shows the summer-time average spatial surface ozone distribution over Europe for  
154 TOMCAT and both CAMS data sets. For all three models, there is peak surface ozone in the  
155 Mediterranean (~50.0-60.0 ppbv), moderate ozone levels over continental Europe (~30.0-50.0 ppbv)  
156 and lower ozone over Scandinavia (~25.0-35.0 ppbv). Here, the largest discrepancy occurs where  
157 TOMCAT has minimum surface ozone values of 25.0 ppbv while 30.0-35.0 ppbv for CAMS. However,  
158 there is generally no consistent systematic difference between TOMCAT and the CAMS datasets. For  
159 instance, there is better agreement (spatially and in absolute terms) between CAMS global and  
160 TOMCAT over the Mediterranean than CAMS regional, while the opposite is true for CAMS regional  
161 and TOMCAT in central Europe. TOMCAT surface ozone has a good spatial correlation with CAMS  
162 global (R=0.66) and CAMS regional (R=0.76) surface ozone. The percentage root-mean-square-error  
163 (RMSE%) between CAMS global and CAMS regional with TOMCAT is 16.8% and 14.5%, respectively.  
164 Comparisons of CAMS global and CAMS regional yield metrics of R=0.77 and RMSE%=12.5%.  
165 Therefore, the spatial domain metrics between all three data sets are consistent suggesting TOMCAT  
166 surface ozone is consistent with that of these higher resolution models.

167 **Figure S9d** shows the daily domain average time-series of the three data sets. TOMCAT typically  
168 simulates summer-time surface ozone values between that of CAMS global and CAMS regional  
169 (apart from the first half of May where it has a low bias of 3.0-5.0 ppbv). The median and 25<sup>th</sup>-75<sup>th</sup>  
170 percentile values of the time-series are also shown. The median values are very similar at 38.1, 39.4  
171 and 37.9 ppbv for TOMCAT, CAMS global and CAMS regional, respectively. The 25<sup>th</sup>-75<sup>th</sup> percentiles

172 have similar surface ozone values, but the TOMCAT inter-quartile range (IQR) is slightly smaller (1.6  
 173 ppbv) than CAMS global (3.2 ppbv) and CAMS regional (5.1 ppbv). The time-series R (RMSE%) values  
 174 between TOMCAT and CAMS global and CAMS regional are 0.76 (6.4%) and 0.75 (4.7%), respectively.  
 175 The inter-CAMS R and RMSE% are 0.9 and 6.8%. Therefore, TOMCAT successfully reproduces the  
 176 summer 2018 surface ozone values over Europe in comparison to higher resolution model datasets,  
 177 which have assimilated observations. Thus, providing further confidence in TOMCAT simulated  
 178 ozone.

179 There is good consistency between GOME-2 (**Figure S10**) and IMS retrieved SCO<sub>3</sub> (**Figure S12**), both  
 180 showing substantial SCO<sub>3</sub> enhancements (4.0-8.0 DU for GOME-2 and 3.0-6.0 DU for IMS) in May and  
 181 July over continental Europe. In June and August, both GOME-2 and IASI show smaller scale SCO<sub>3</sub>  
 182 enhancements of 1.0-3.5 DU across Europe. In April and May, both instruments show enhancements  
 183 over the North Atlantic (3.0-9.0 DU). The spatial correlation between instruments over Europe (i.e.  
 184 domain in **Figures S10-13**) ranges between 0.21 and 0.47 for the monthly differences. Therefore,  
 185 considering that the GOME-2 and IASI retrievals use ultraviolet (UV) and infrared (IR) wavelengths,  
 186 respectively, with peak vertical sensitivities in the lower and mid/upper troposphere, consistency in  
 187 the magnitudes and patterns of the 2018-2017 enhancements in retrieved SCO<sub>3</sub> indicates these to  
 188 extend over the bulk of the troposphere. It also provides confidence in these satellite observations  
 189 to detect regional tropospheric spatiotemporal variability. To evaluate TOMCAT and assess its ability  
 190 to simulate enhancements in SCO<sub>3</sub> in comparison to GOME-2 and IASI, the satellite averaging kernels  
 191 (AKs) (i.e. the satellite vertical smearing) need to be applied to TOMCAT to allow for like-for-like  
 192 comparisons. The GOME-2 (**Equation S1**) and IASI (**Equation S2**) AKs are applied as:

$$193 \quad TOMCAT_{AK} = AK \cdot TOMCAT_{int} + imak_{sc\_apr} \quad (S1)$$

$$194 \quad TOMCAT_{AK} = AK \cdot (TOMCAT_{int} - apr) + apr \quad (S2)$$

195 where  $TOMCAT_{AK}$  is the modified model sub-column profile (DU),  $AK$  is the averaging kernel matrix,  
 196  $TOMCAT_{int}$  is the TOMCAT sub-column profile (DU) on the satellite pressure grid and  $apr$  is the  
 197 apriori (DU) and  $imak_{sc\_apr}$  represents the term  $(I- AK) \cdot apr$  where  $I$  is the identity matrix.

198 For TOMCAT with GOME-2 or IMS AKs applied in **Figures S11** and **S13**, positive SCO<sub>3</sub> differences  
 199 occur primarily in May and July (1.0-3.0 DU) over continental Europe, similarly to the respective  
 200 retrievals. In June and August, again like the respective retrievals, the SCO<sub>3</sub> enhancements over  
 201 Europe are widespread but weaker between 0.0 to 2.0 DU (though more noticeable in  
 202 TOMCAT\_IASI\_AK). Also, in April and May, both TOMCAT data sets show SCO<sub>3</sub> enhancements over  
 203 the North Atlantic (0.0-2.0 DU for TOMCAT\_G2\_AK and 1.0-3.0 DU for TOMCAT\_IASI\_AK). There are  
 204 a few observed instances of negative difference (e.g. -2.0 to 0.0 DU) over central Europe in  
 205 September and the mid-North Atlantic in May and June. However, the TOMCAT signal tends to be  
 206 weaker. In terms of spatial patterns in the SCO<sub>3</sub> difference between 2017 and 2018, correlations  
 207 between TOMCAT\_G2\_AK and GOME-2 range between 0.33 and 0.54 over Europe for monthly data  
 208 and 0.47 for a six monthly average. For TOMCAT\_IASI\_AK and IASI, they range between 0.39 and  
 209 0.63 for monthly data and 0.53 for a six monthly average.

210 In summary, TOMCAT is able to reproduce the sign and spatial distribution of the 2018-2017 O<sub>3</sub>  
 211 differences in the surface and satellite observations. Through the summer months of 2018, TOMCAT,  
 212 like the observations, shows there are enhancements in surface/lower tropospheric O<sub>3</sub> in 2018, but  
 213 the absolute magnitude tends to be larger in the observational datasets. Therefore, we consider the

214 TOMCAT model to be a suitable tool to diagnose the drivers of the European summer 2018 lower  
215 tropospheric O<sub>3</sub> enhancements.

## 216 **SM 6 – ROTRAJ Back-trajectories**

217 Advection of tropospheric O<sub>3</sub>-rich air masses into Europe potentially contributed towards the  
218 observed enhancements in the summer of 2018. To investigate this we have utilised back-  
219 trajectories from the Reading Offline Trajectory Model (ROTRAJ), a Lagrangian atmospheric  
220 transport model (Methven *et al.*, 2003), to quantify the import of O<sub>3</sub> into the domain. ROTRAJ was  
221 initialised over Paris and Berlin (two central locations within the domain) and back-trajectories  
222 released for 10 days in 6 hour intervals (i.e. 41 points, including release point). A back-trajectory was  
223 released every 6 hours throughout May to August in 2017 and 2018 (i.e. 492 back-trajectories in  
224 total) with output at 00 UTC, 06 UTC, 12 UTC and 18 UTC. As we investigate modelled O<sub>3</sub> at the  
225 surface and at 500 hPa, the back-trajectories were released at these two altitudes. In total, ROTRAJ  
226 was run 8 times (i.e. 2 years x 2 locations x 2 altitudes). To determine the level of O<sub>3</sub> being  
227 transported into the domain, each trajectory point in the trajectory path was co-located with  
228 TOMCAT O<sub>3</sub> data (i.e. the closest grid box, altitude level and model 6-hourly time step) and the  
229 trajectory O<sub>3</sub> average determined (i.e. back-trajectories from O<sub>3</sub>-rich air masses will be larger). These  
230 O<sub>3</sub>-weighted back-trajectories (O<sub>3</sub>WBT) for Paris and Berlin (May-August 2017 & 2018) at the surface  
231 and 500 hPa have been plotted in **Figures S14** and **15**. However, as the O<sub>3</sub>WBT are subject to large  
232 scale variability, they have been averaged them onto the TOMCAT horizontal spatial resolution in  
233 the corresponding panels in **Figures S16** and **17**.

234 When initialised at the surface in Paris (**Figure S16a & b**) the O<sub>3</sub>WBT range from 40.0 ppbv to >50.0  
235 ppbv over continental Europe in both years, but 40.0-45.0 ppbv and 33.0-40.0 ppbv over the North  
236 Atlantic in 2017 and 2018, respectively. A similar spatial pattern occurs when initialised at the  
237 surface over Berlin (**Figure S17a & b**) where continental Europe has O<sub>3</sub>WBT values of 40.0-50.0 ppbv  
238 in both years (though approximately 30.0 ppbv over Scandinavia in 2017). Over the North Atlantic,  
239 this ranges from 40.0-45.0 ppbv and 35.0-42.0 ppbv in 2017 and 2018, respectively. This appears to  
240 suggest that in 2017, the import of O<sub>3</sub>-rich air masses into Europe was larger than that of 2018.  
241 Therefore, the surface enhancements in O<sub>3</sub> in the summer of 2018 were predominantly not from  
242 advected O<sub>3</sub> into the domain.

243 At approximately 500 hPa, a different relationship exists. As the back-trajectories are initialised at a  
244 higher altitude, with larger horizontal wind velocities (i.e. the free troposphere), they originate from  
245 distances further way than those at the surface. When initialised over Paris at approximately 500  
246 hPa (**Figure S16c & d**), the O<sub>3</sub>WBT values are more spatially uniform, increasing in value towards the  
247 Arctic. Below and above 50°N, the O<sub>3</sub>WBT values range from 45.0-60.0 ppbv and from 50.0-80.0  
248 ppbv, respectively, in 2017. For 2018, a similar spatial pattern occurs but with larger O<sub>3</sub>WBT values  
249 over the southern North Atlantic of 55.0-65.0 ppbv. For Berlin at approximately 500 hPa (**Figure**  
250 **SM6c & d**), the same large scale signal exists with similar absolute O<sub>3</sub>WBT values. Therefore, there  
251 appears to be transport of O<sub>3</sub>-rich air in 2018 (typically 3.0-7.0 ppbv larger than in 2017) from the  
252 southern North Atlantic to the 500 hPa layer over Europe helping to promote the observed and  
253 modelled summer-time 2018 enhancements. However, between approximately 50°N and 60°N, the  
254 2017 O<sub>3</sub>WBT values tend to be slightly larger (e.g. by 3.0-5.0 ppbv in places), which will partially  
255 offset the southern North Atlantic signal.

256 To investigate the vertical extent of the profiles, we plot time-pressure profiles for each year of the  
257 trajectories released at both sites and altitudes (**Figure S18-S21**). The trajectories are grouped by  
258 locations originating north and south of the release points to add some spatial context (e.g. are they  
259 from the southern North Atlantic or northern North Atlantic). When initialised from Paris at the  
260 surface (**Figure S18**), the majority of the trajectories originated north of the release point in both  
261 2017 and 2018. Trajectories originating south of the site have an average O<sub>3</sub>WBT value of 41.7 ppbv  
262 and 42.1 ppbv in 2017 and 2018. Therefore, there is little difference between them and are all  
263 constrained to the troposphere (peak trajectories originate from approximately 500 hPa). For sites  
264 originating north of the release point, the sample sizes are larger with similar average O<sub>3</sub>WBT values  
265 of 39.4 ppbv and 39.6 ppbv between years. Though, there is a larger vertical distribution in the  
266 trajectories with more originating from the mid-troposphere (600-400 hPa). When initialised from  
267 Berlin, at the surface (**Figure S19**), the trajectories originating from the south are less frequent but  
268 do show a larger flux of O<sub>3</sub> towards the release site in 2017 than 2018 with O<sub>3</sub>WBT values of 40.7  
269 ppbv and 37.4 ppbv. North of the release point, again there are many more trajectories. Here, the  
270 vertical distribution for both years is consistent with that of Paris (**Figure S18**) and have average  
271 O<sub>3</sub>WBT values of 39.5 ppbv and 38.3 ppbv. Therefore, this is generally supportive that advection of  
272 O<sub>3</sub>-rich air into continental Europe was larger in the summer of 2017 than 2018.

273 When released at 500 hPa, for both release points, the advection of O<sub>3</sub>-rich air was more substantial  
274 in 2018. For Paris (**Figure S20**), the average O<sub>3</sub>WBT values, for trajectories originating south of the  
275 release point, were 57.3 ppbv and 59.8 ppbv for both years. North of the release site, this was 70.9  
276 ppbv and 75.9 ppbv for 2017 and 2018. For Berlin (**Figure S21**), the corresponding average O<sub>3</sub>WBT  
277 values (south of release point) were 55.0 ppbv and 59.3 ppbv in 2017 and 2018 and (north of release  
278 point) was 73.4 ppbv in both years. Vertically, for both release points and years, trajectories south of  
279 the release points range from the surface (50.0-65.0 ppbv) and 300 hPa (60.0-75.0 ppbv). North of  
280 the release points, the trajectories are more constrained to the lower troposphere (800-600 hPa  
281 with O<sub>3</sub>WBT values of 50.0-70.0 ppbv) and upper troposphere 350-250 hPa (O<sub>3</sub>WBT >80.0 ppbv).  
282 Here, the bulk of the trajectories, before converging on 500 hPa by Day 0, are between 400 and 250  
283 hPa with larger O<sub>3</sub>WBT values (70->80.0 ppbv). Therefore, trajectories originating south of the  
284 release point are representative of tropospheric O<sub>3</sub>, while north of the release point (where the  
285 tropopause is lower in altitude) the trajectories are exposed to O<sub>3</sub>-rich airmasses originating from  
286 the lower stratosphere (i.e. the back trajectories have close proximity to the tropopause pressure –  
287 see **Figures S20 & 21**). Overall, though, advection of O<sub>3</sub>-rich air into continental Europe is more  
288 pronounced in 2018 over 2017 at the 500 hPa level. Based on the spatial maps (**Figures S16-S17** and  
289 **Figure 12** of the main manuscript, this 2018 O<sub>3</sub> enhancement is predominantly originating from  
290 tropospheric sources in the southern North Atlantic.

## 291 References

292 Best, M.J., Pryor, M., Clark, D.B., et al.: The Joint UK Land Environment Simulator (JULES), model  
293 description—Part 1: energy and water fluxes, *Geoscientific Model Development*, 4, 677–699, doi:  
294 10.5194/gmd-4-677-2011, 2011.

295 Clark, D. B., Mercado, L.M., Sitch, S., et al.: The Joint UK Land Environment Simulator (JULES), model  
296 description—Part 2: carbon fluxes and vegetation dynamics, *Geoscientific Model Development*, 4,  
297 701–722, doi: doi.org/10.5194/gmd-4-701-2011, 2011.



298 Methven, J., Arnold, S.R., O'Connor, F.M., et al.: Estimating photochemically produced ozone  
299 throughout a domain using flight data and a Lagrangian model, *Journal of Geophysical Research:*  
300 *Atmospheres*, **10** (D9), doi:10.1029/2002JD002955, 2003.

301 Pacifico, F., Harrison, S.P., Jones, C.D., et al.: Evaluation of a photosynthesis-based biogenic isoprene  
302 emission scheme in JULES and simulation of isoprene emissions under present-day climate  
303 conditions, *Atmospheric Chemistry and Physics*, **11**, 4371–4389, doi: 10.5194/acp-11-4371-2011,  
304 2011.

305 Pope, R.J., Butt, E.W., Chipperfield, M.P., et al.: The impact of synoptic weather on UK surface ozone  
306 and implications for premature mortality. *Environmental Research Letters*, **11**, 124004,  
307 doi:10.1088/1748-9326/11/12/124004, 2016.

308 Pope, R.J., Arnold, S.R., Chipperfield, M.P., et al.: Substantial Increases in Eastern Amazon and  
309 Cerrado Biomass Burning-Sourced Tropospheric Ozone. *Geophysical Research Letters*, **47** (3),  
310 e2019GL084143, doi: 10.1029/2019GL084143, 2020.

311 Pope, R. J., Kerridge, B. J., Siddans, R., et al.: Large enhancements in southern hemisphere satellite-  
312 observed trace gases due to the 2019/2020 Australian wildfires, *Journal of Geophysical Research:*  
313 *Atmospheres*, 1–13, doi:10.1029/2021jd034892, 2021.

314 Wagner, A., Bennouna, Y., Blechschmidt, A.M., et al.: Comprehensive evaluation of the Copernicus  
315 Atmosphere Monitoring Service (CAMS) reanalysis against independent observations: Reactive  
316 gases, *Elementa: Science of the Anthropocene*, **9** (1), doi: 10.1525/elementa.2020.00171., 2021.

317 Zhang, Z., Xue, Y., MacDonald, G., et al.: Investigation of North American vegetation variability under  
318 recent climate: A study using the SSiB4/TRIFFID biophysical/dynamic vegetation model, *Journal of*  
319 *Geophysical Research: Atmospheres*, **120**: 1300– 1321. doi: 10.1002/2014JD021963, 2015.

320

321

322

323

324

325

326

327

328

329

330

331

332

333

334

335

336

337 **Figures:**

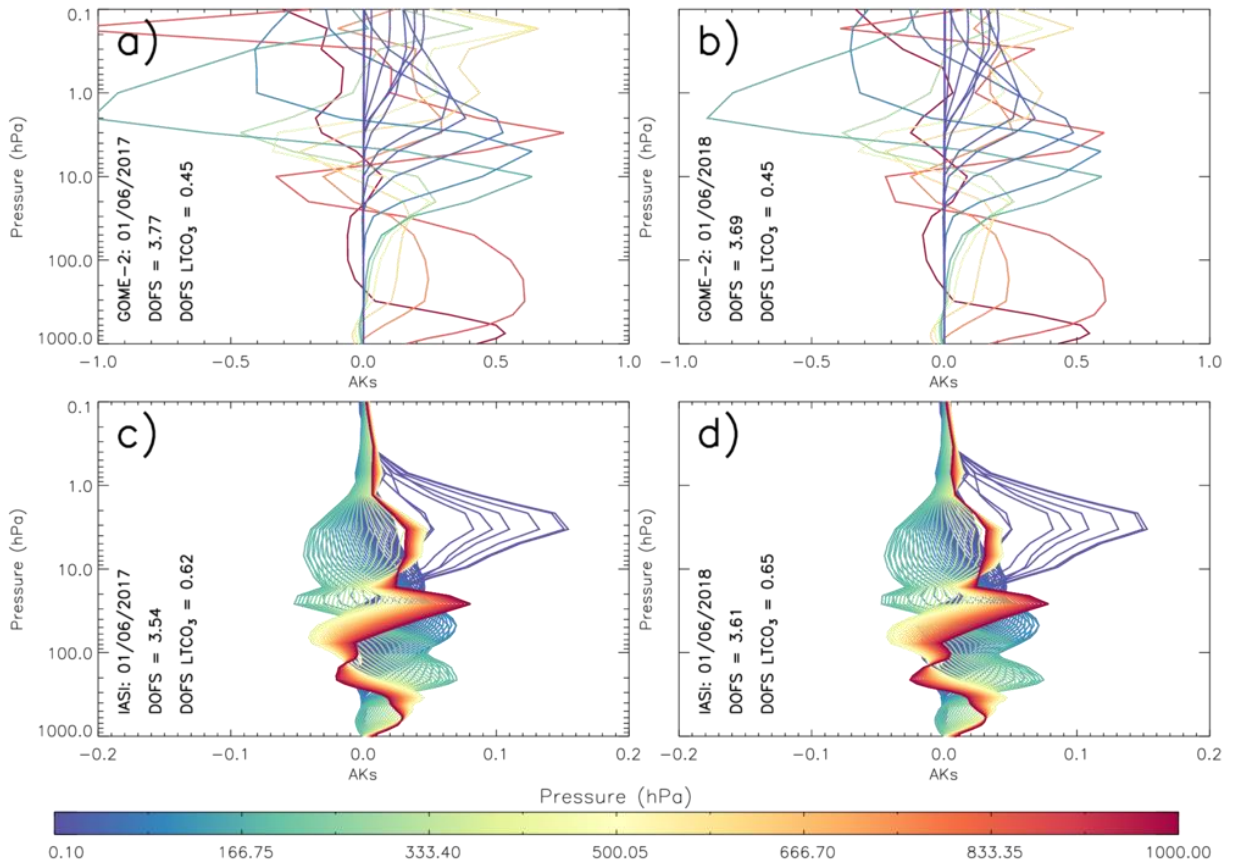

338

339 **Figure S1:** Example European domain average averaging kernels (AKs) for retrieved ozone profiles  
340 for a) GOME-2 on the 1<sup>st</sup> June 2017, b) GOME-2 on the 1<sup>st</sup> June 2018, c) IMS on the 1<sup>st</sup> June 2017 and  
341 d) IMS on the 1<sup>st</sup> June 2018. The degrees of freedom of signal (DOFS) for the full profile and lowest  
342 sub-column (LTCO<sub>3</sub>, surface – 450 hPa) are also shown.

343

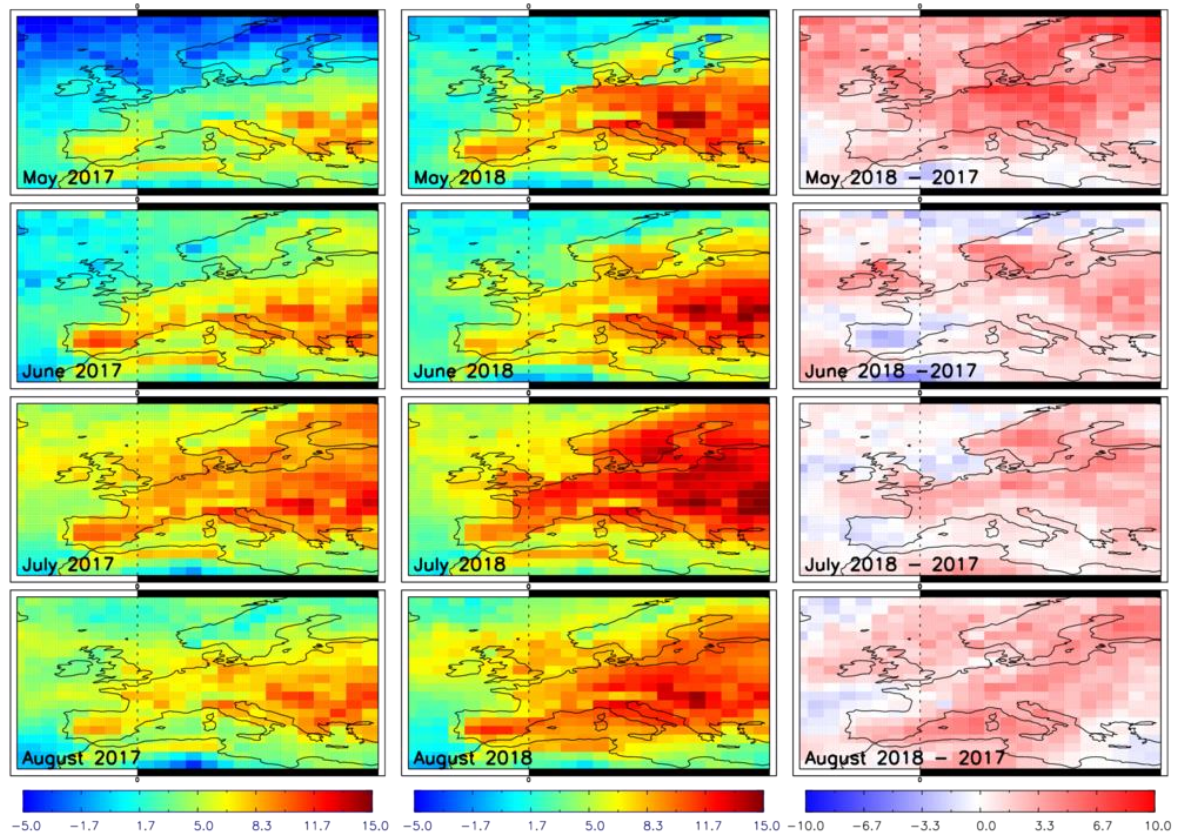

344

345

346

347

348

349

**Figure S2:** Total column methanol retrieved from Metop-A by the extended IMS scheme ( $\text{CH}_3\text{OH}$ ,  $\times 10^{15}$  molecules/ $\text{cm}^2$ ) for May to August in 2017 (left column), 2018 (centre column) and 2018-2017 difference (right column) over Europe.

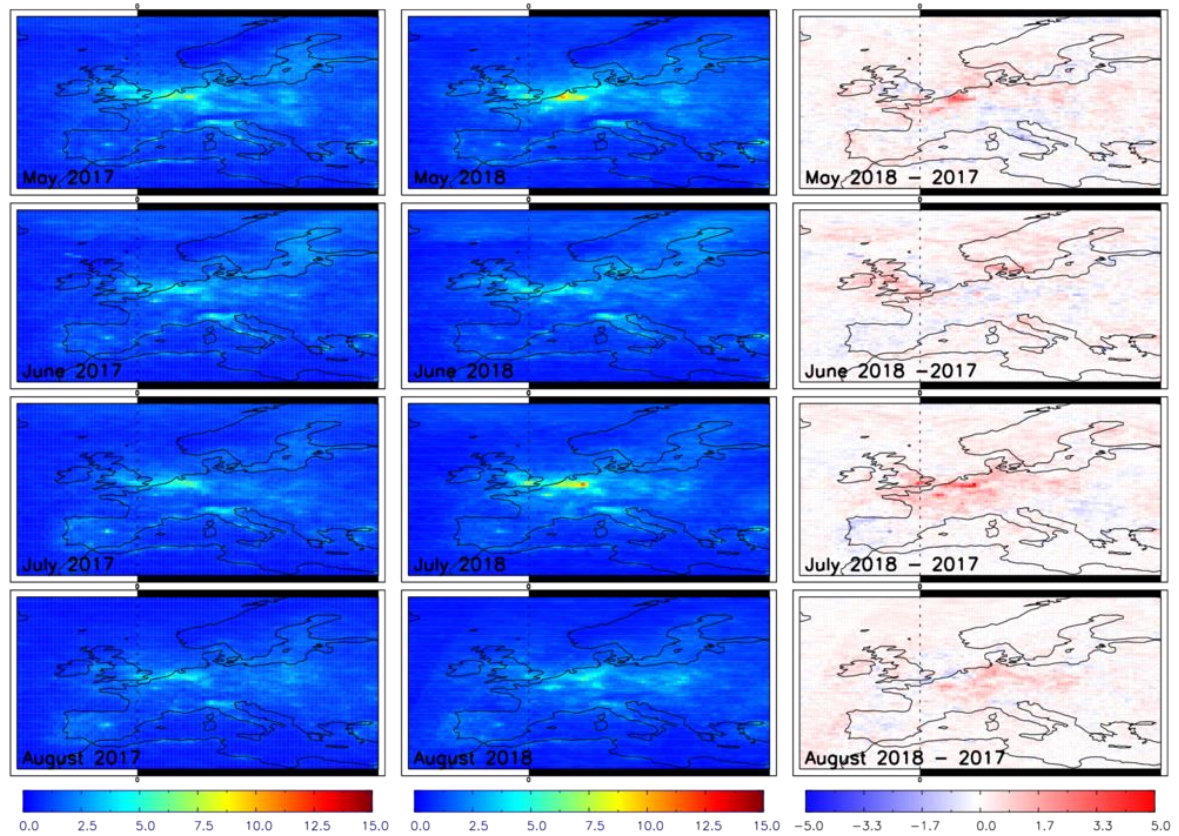

350

351 **Figure S3:** GOME-2 tropospheric column nitrogen dioxide ( $\text{NO}_2$ ,  $\times 10^{15}$  molecules/ $\text{cm}^2$ ) for May to  
 352 August in 2017 (left column), 2018 (centre column) and 2018-2017 difference (right column) over  
 353 Europe.

354

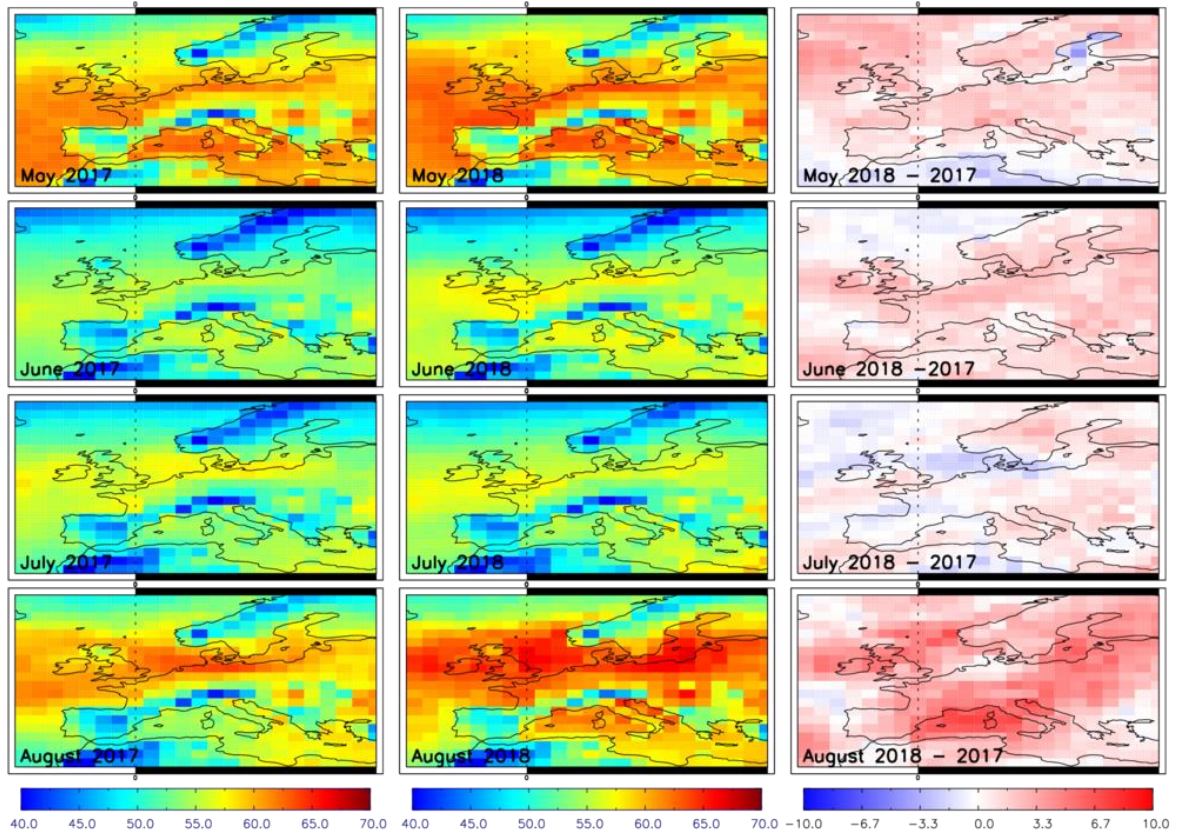

355

356 **Figure S4:** Total column carbon monoxide retrieved from MetOp-A by the extended IMS scheme (CO,  
 357 Dobson units (DU)) for May to August in 2017 (left column), 2018 (centre column) and 2018-2017  
 358 difference (right column) over Europe.

359

360

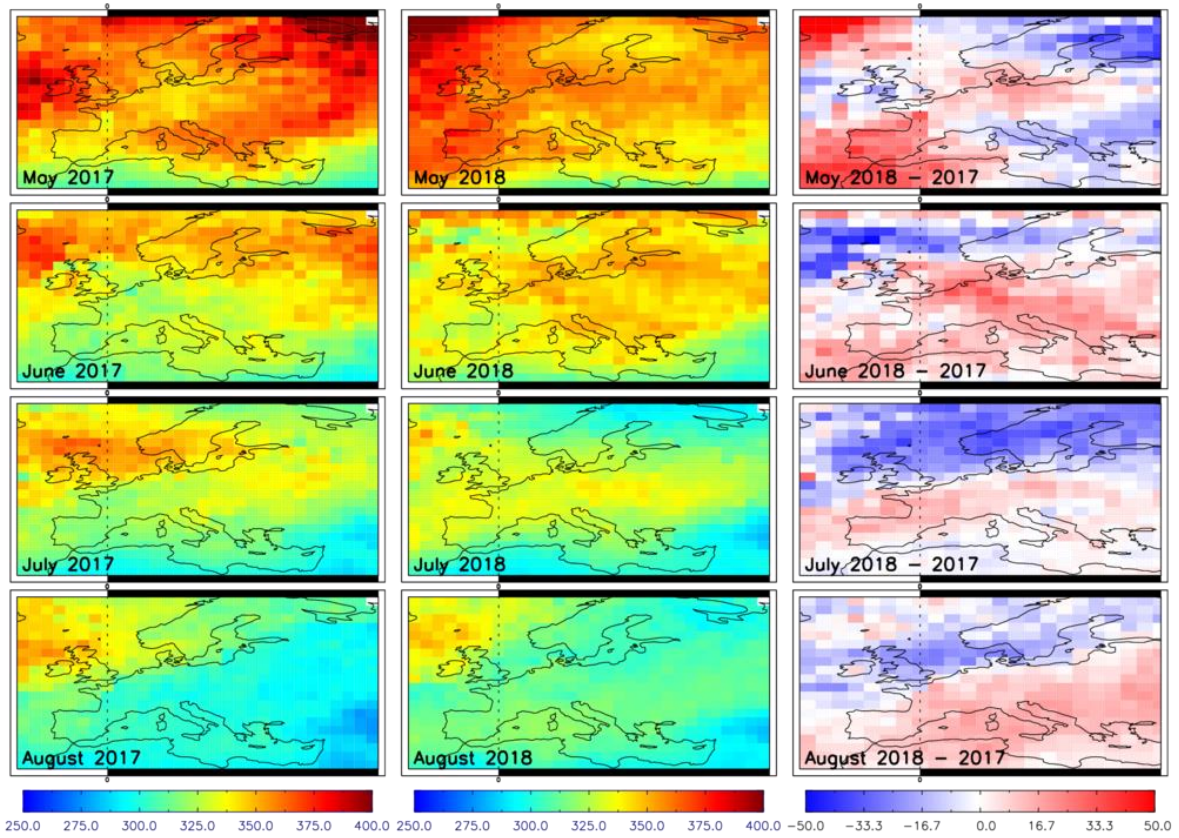

361

362 **Figure S5:** GOME-2 total column ozone ( $O_3$ , DU) for May to August in 2017 (left column), 2018  
 363 (centre column) and 2018-2017 difference (right column) over Europe.

364

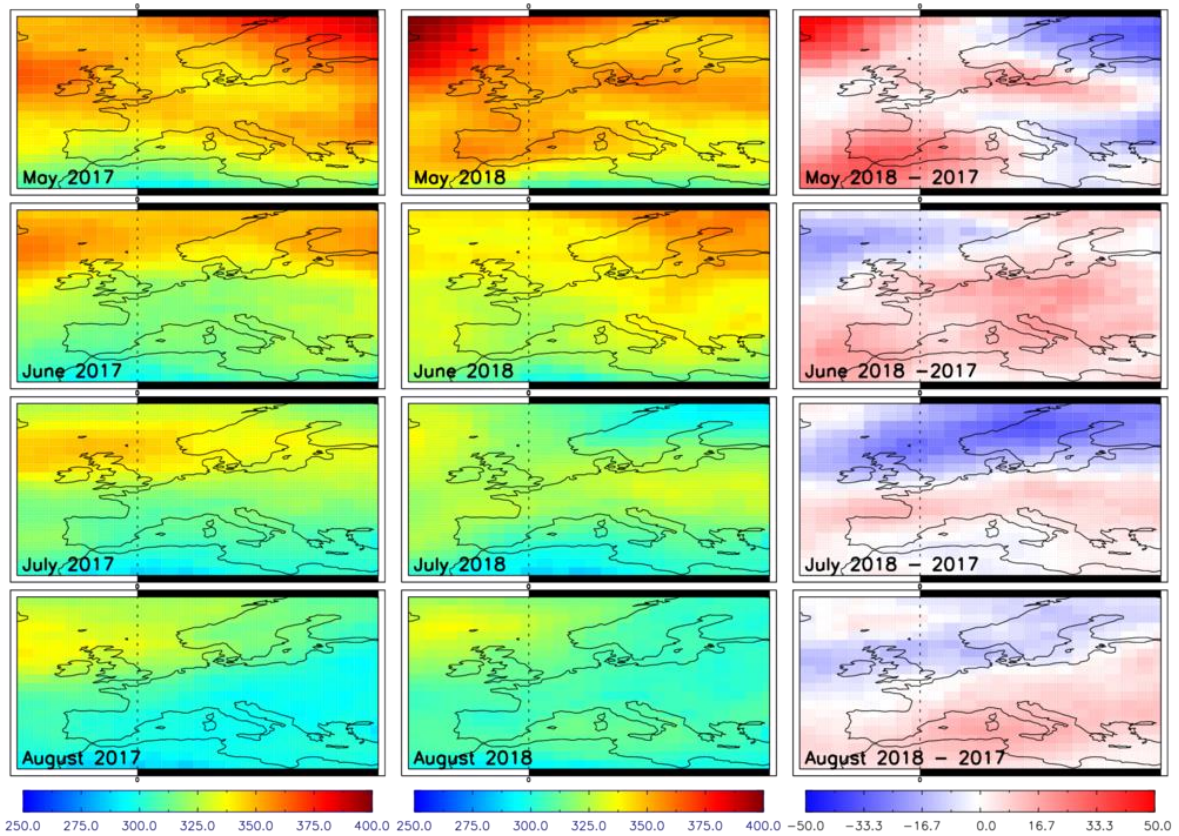

365

366

367

368

369

**Figure S6:** Total column O<sub>3</sub> (DU) retrieved from MetOp-A by the extended IMS scheme for May to August in 2017 (left column), 2018 (centre column) and 2018-2017 difference (right column) over Europe.

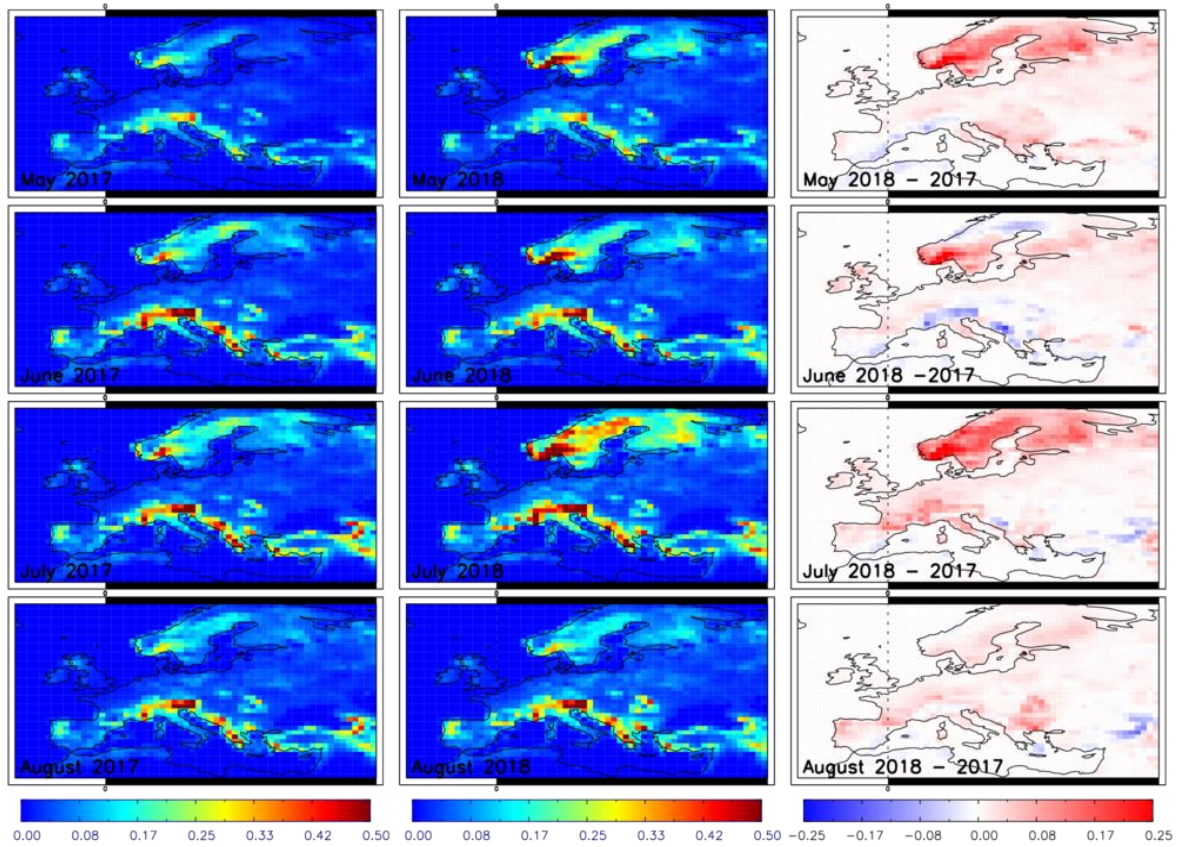

370  
 371  
 372  
 373  
 374  
 375

**Figure S7:** JULES biogenic emissions (summation of isoprene, acetone, methanol and monoterpenes in  $\mu\text{g}/\text{m}^2/\text{s}$  of C) for May to August in 2017 (left column), 2018 (centre column) and 2018-2017 difference (right column) over Europe.



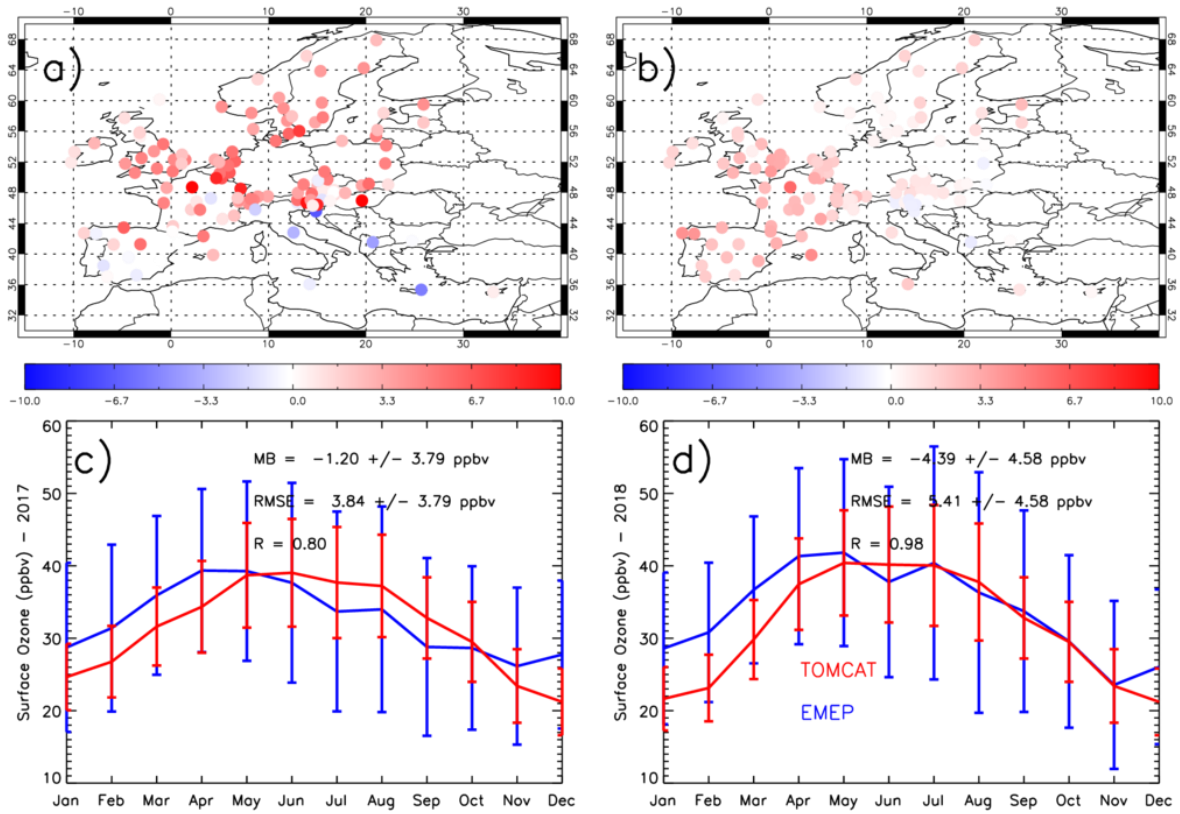

376

377

378

379

380

381

**Figure S8:** Surface O<sub>3</sub> (ppbv) May-June-July-August 2018-2017 average difference for a) EMEP sites and b) TOMCAT. The observational (blue) and modelled (red) surface O<sub>3</sub> seasonal cycle are for c) 2017 and d) 2018. Vertical bars represent the monthly standard deviations. The statistics in the top right of c) and d) are the mean bias (MB), the root mean square error (RMSE) and correlation (R). The uncertainties on the MB and RMSE are the standard errors corrected for temporal autocorrelation.

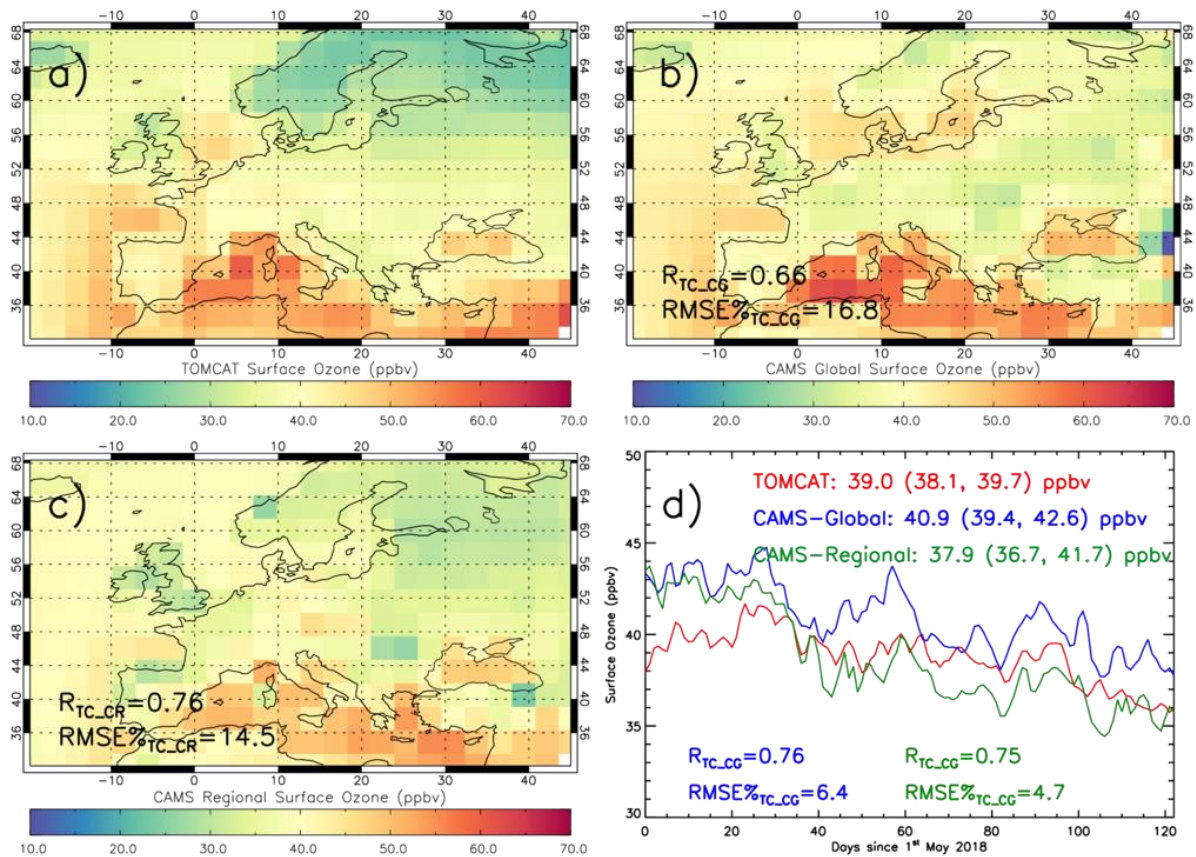

382

383 **Figure S9:** Surface ozone (ppbv) averaged between 1<sup>st</sup> May and 31<sup>st</sup> August 2018 for a) TOMCAT, b)  
 384 CAMS global reanalyses and c) CAMS regional reanalyses. The correlation (R) and percentage root-  
 385 mean-square-error (RMSE%) between TOMCAT and CAMS global (CG) and CAMS regional (CR)  
 386 reanalyses are shown in the bottom of panels b) and c). Panel d) shows the daily domain average  
 387 surface ozone (ppbv) time-series between 1<sup>st</sup> May and 31<sup>st</sup> August 2018 for TOMCAT (red), CAMS  
 388 global reanalyses (blue) and CAMS regional reanalyses (green). The number after the model labels  
 389 are the time-series median (25<sup>th</sup> percentile, 75<sup>th</sup> percentile) values. The R and RMSE% metrics show  
 390 the same information as the maps but between the TOMCAT and CAMS time-series (coloured  
 391 accordingly).

392

393

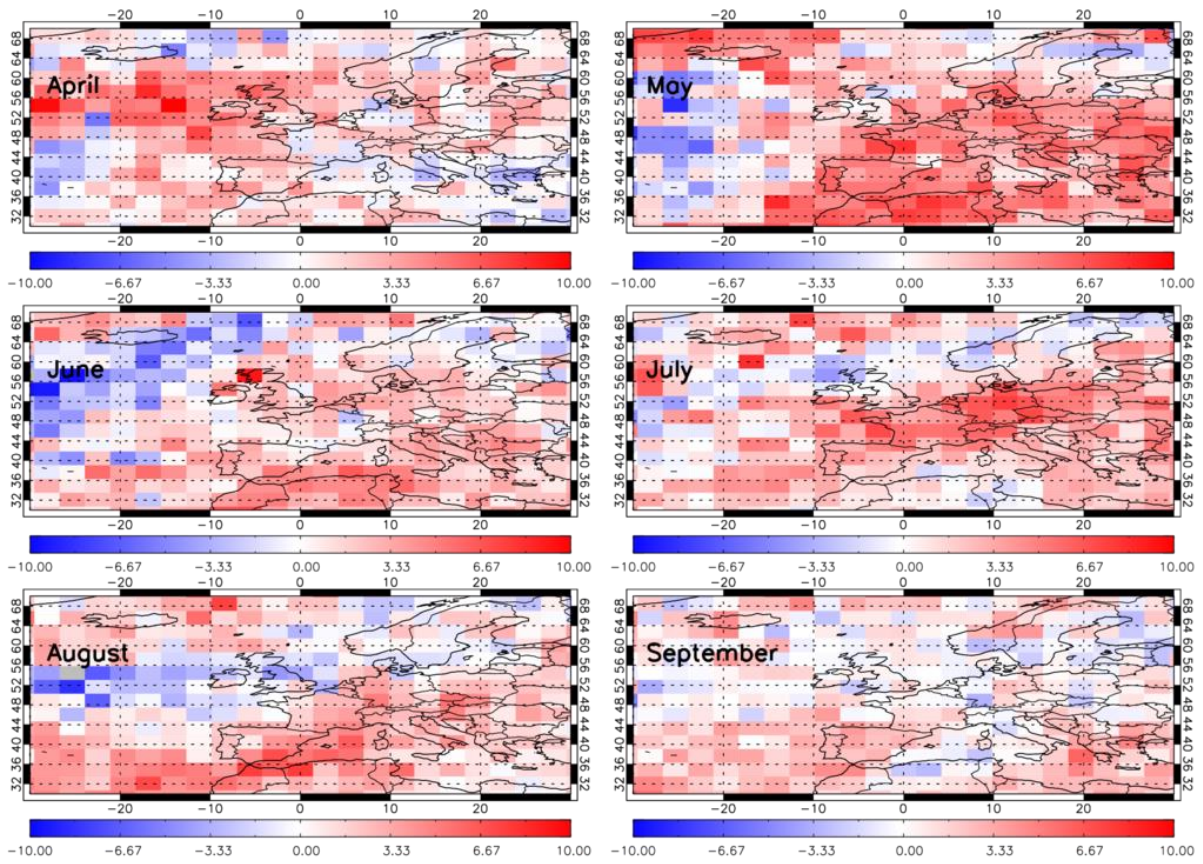

394

395 **Figure S10:** Surface-450hPa sub-column ozone (SCO<sub>3</sub>) 2018-2017 differences from GOME-2 for April  
 396 to September over Europe. SCO<sub>3</sub> units are in Dobson units (DU).

397

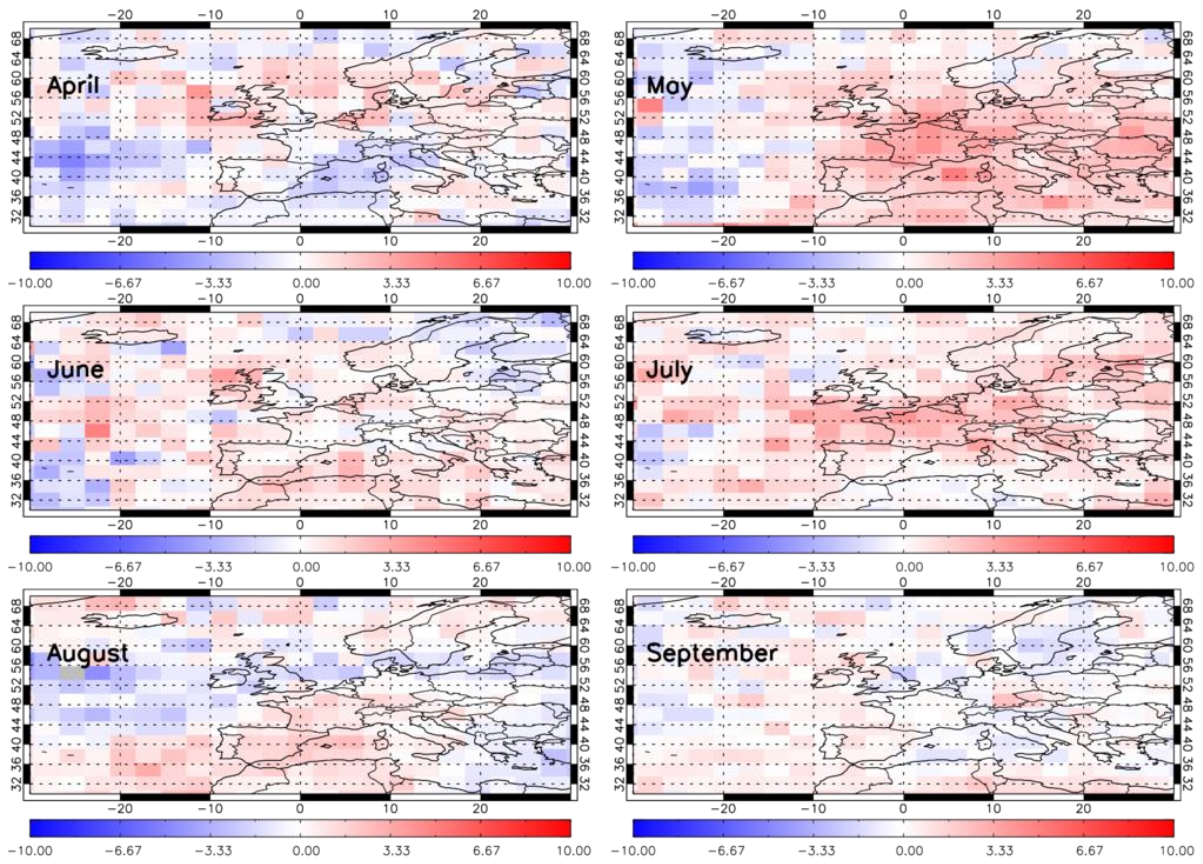

398

399 **Figure S11:** Surface-450hPa TOMCAT  $\text{SCO}_3$  (DU), with the GOME-2 averaging kernels (AKs) applied,  
 400 2018-2017 differences for April to September over Europe.

401

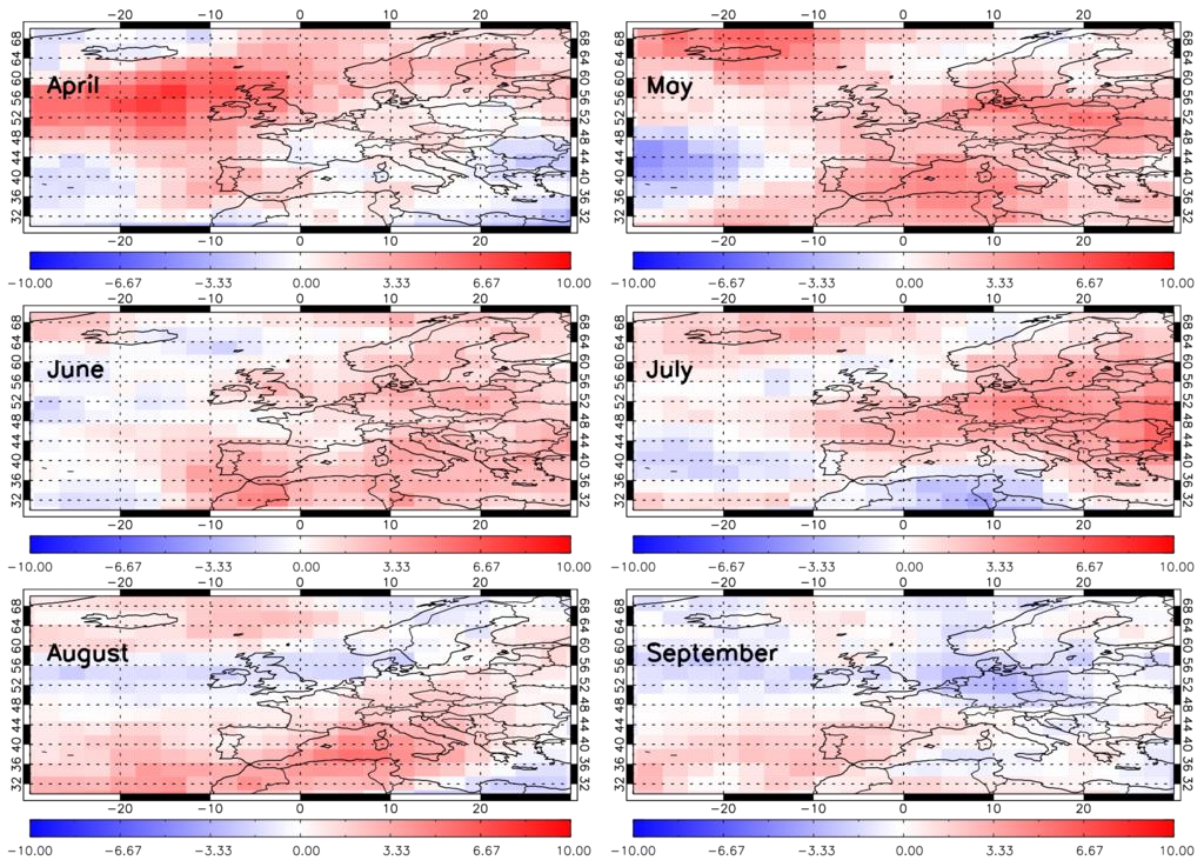

402  
 403  
 404

Figure S12: Surface-450hPa IMS SCO<sub>3</sub> (DU) 2018-2017 differences for April to September over Europe.

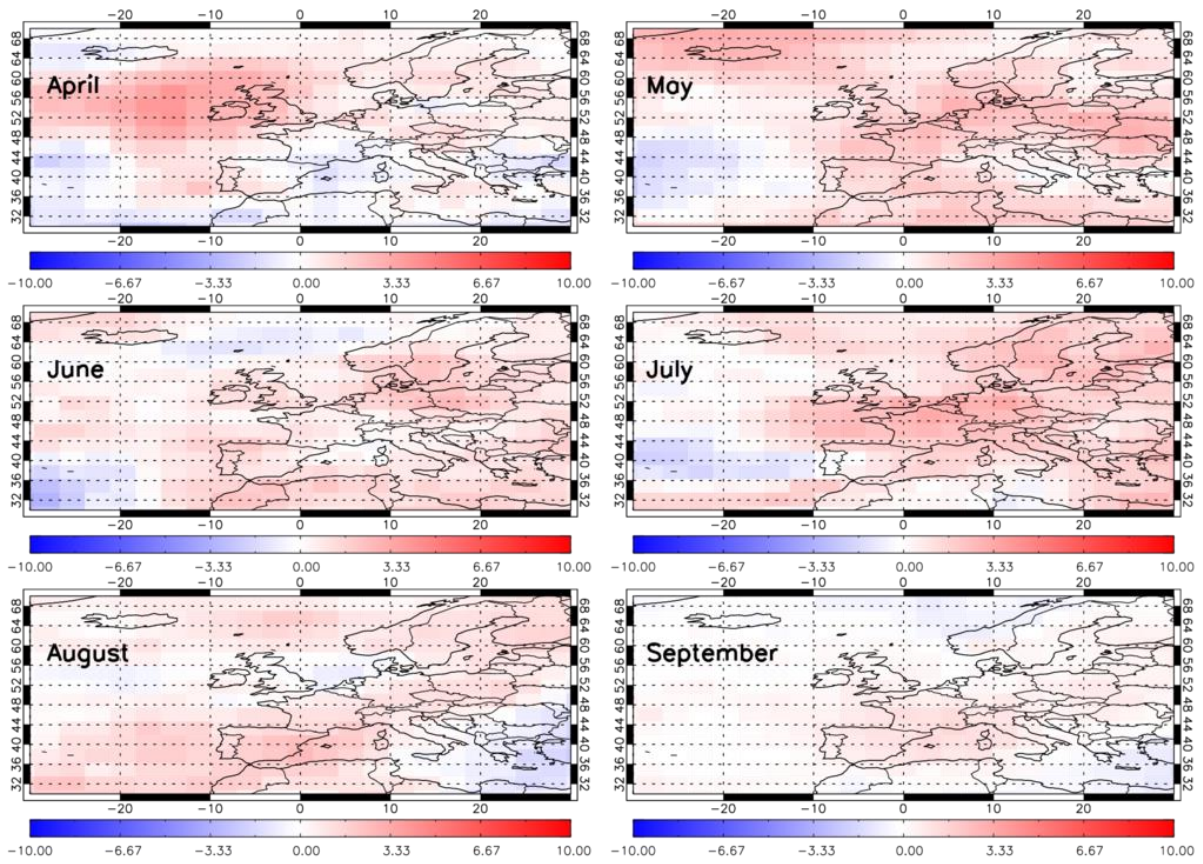

405  
 406  
 407  
 408

**Figure S13:** Surface-450hPa TOMCAT  $\text{SCO}_3$  (DU), with the IMS averaging kernels (AKs) applied, 2018-2017 differences for April to September over Europe.

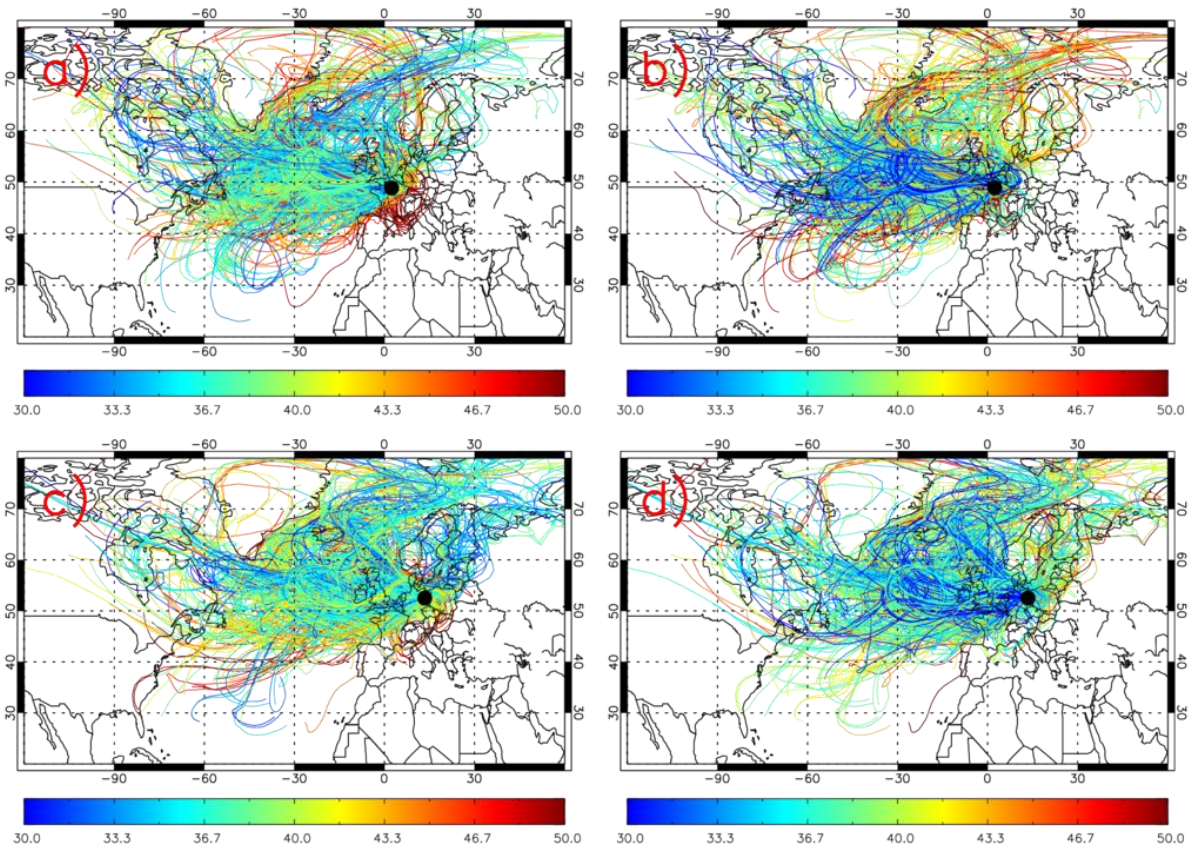

409

410 **Figure S14:** ROTRAJ back-trajectories (10 days), weighted by the average TOMCAT O<sub>3</sub> (ppbv)  
 411 concentration along each trajectory path, for a) Paris at the surface between May and August in  
 412 2017, b) Paris at the surface between May and August in 2018, c) Berlin at the surface between May  
 413 and August in 2017 and d) Berlin at the surface between May and August in 2018. The black circles  
 414 represent the location of Paris and Berlin where the trajectories were released from.

415

416

417

418

419

420

421

422

423

424

425

426

427

428

429

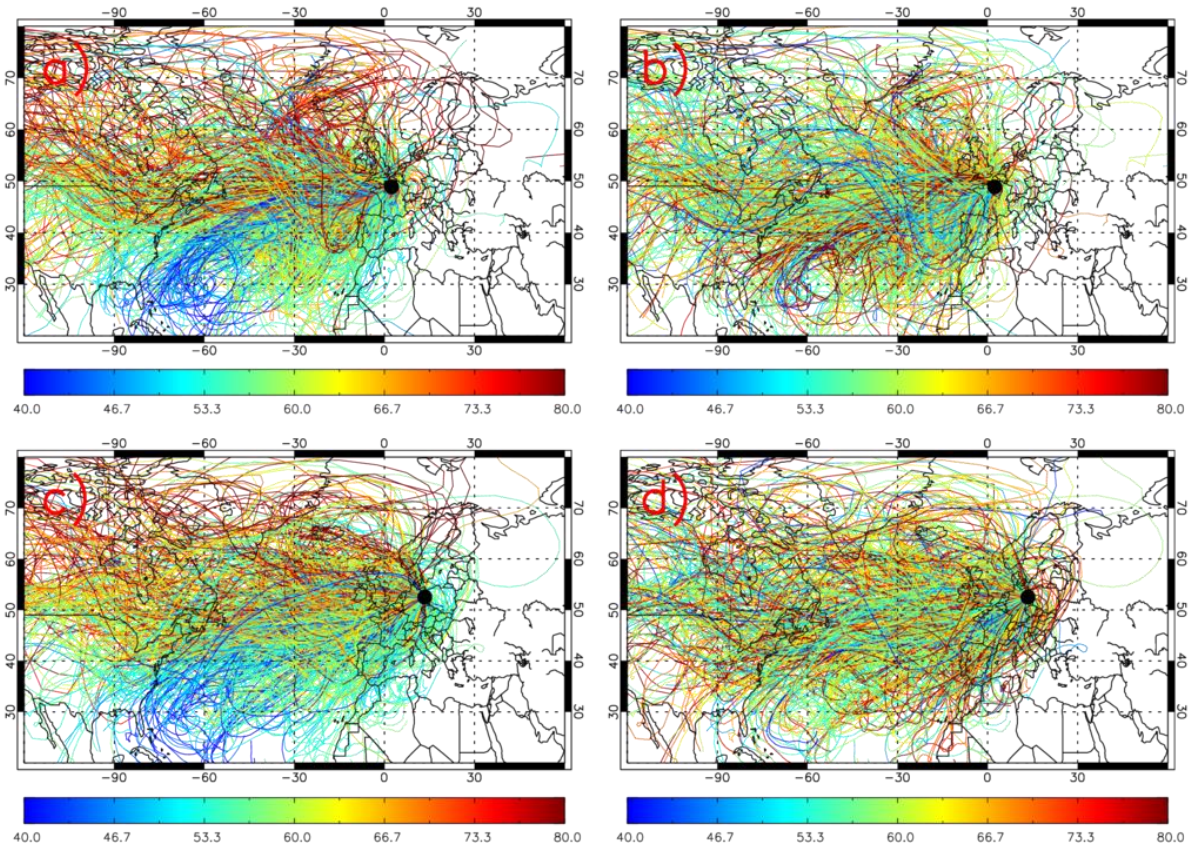

430

431 **Figure S15:** ROTRAJ back-trajectories (10 days), weighted by the average TOMCAT O<sub>3</sub> (ppbv)  
432 concentration along each trajectory path, for a) Paris at approximately 500 hPa between May and  
433 August in 2017, b) Paris at approximately 500 hPa between May and August in 2018, c) Berlin at  
434 approximately 500 hPa between May and August in 2017 and d) Berlin at approximately 500 hPa  
435 between May and August in 2018. The black circles represent the location of Paris and Berlin where  
436 the trajectories were released from.

437

438

439

440

441

442

443



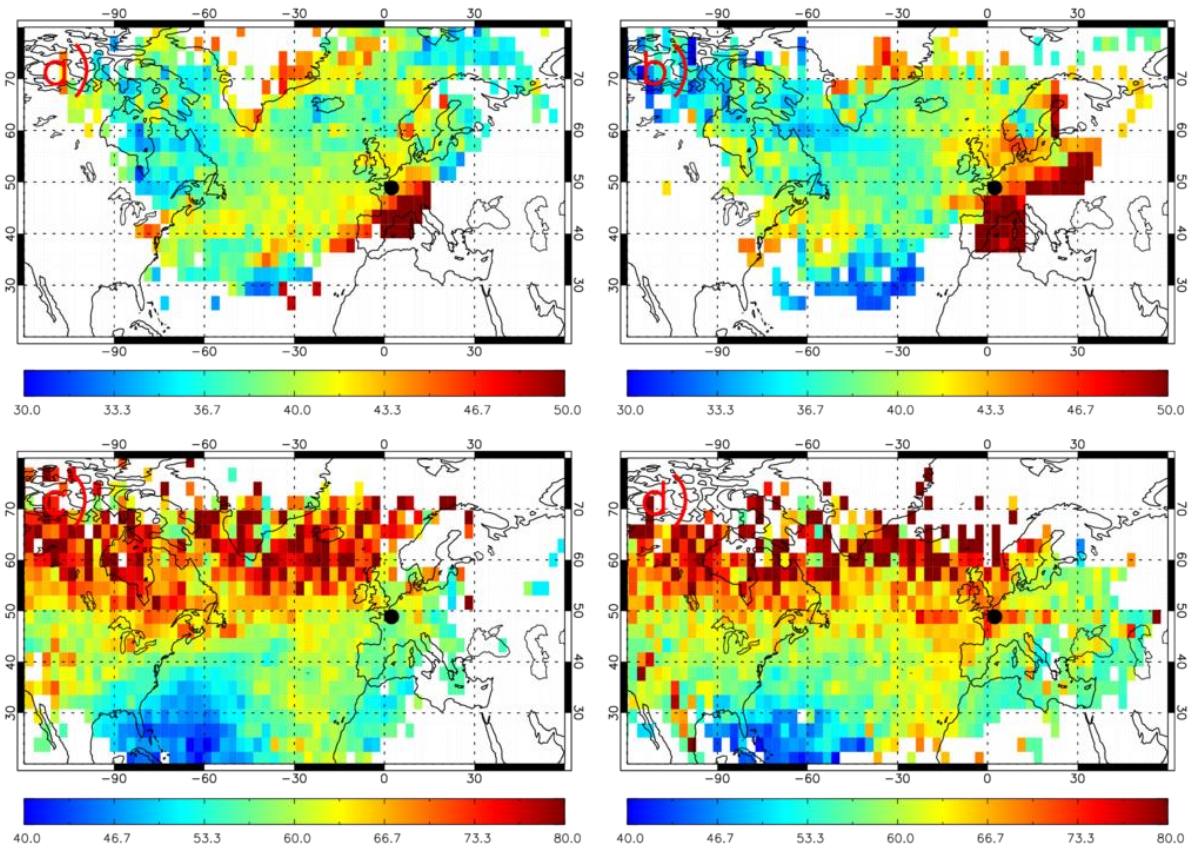

444

445 **Figure S16:** ROTRAJ back-trajectories (10 days) released from Paris (May-August), weighted by the  
 446 average TOMCAT O<sub>3</sub> (ppbv) concentration along each trajectory path, gridded onto the TOMCAT  
 447 horizontal resolution for a) at the surface in 2017, b) at the surface in 2018, c) at approximately 500  
 448 hPa in 2017 and d) at approximately 500 hPa in 2018. The black circles represent the location of Paris  
 449 where the trajectories were released from.

450

451

452

453

454

455

456

457

458

459

460

461

462

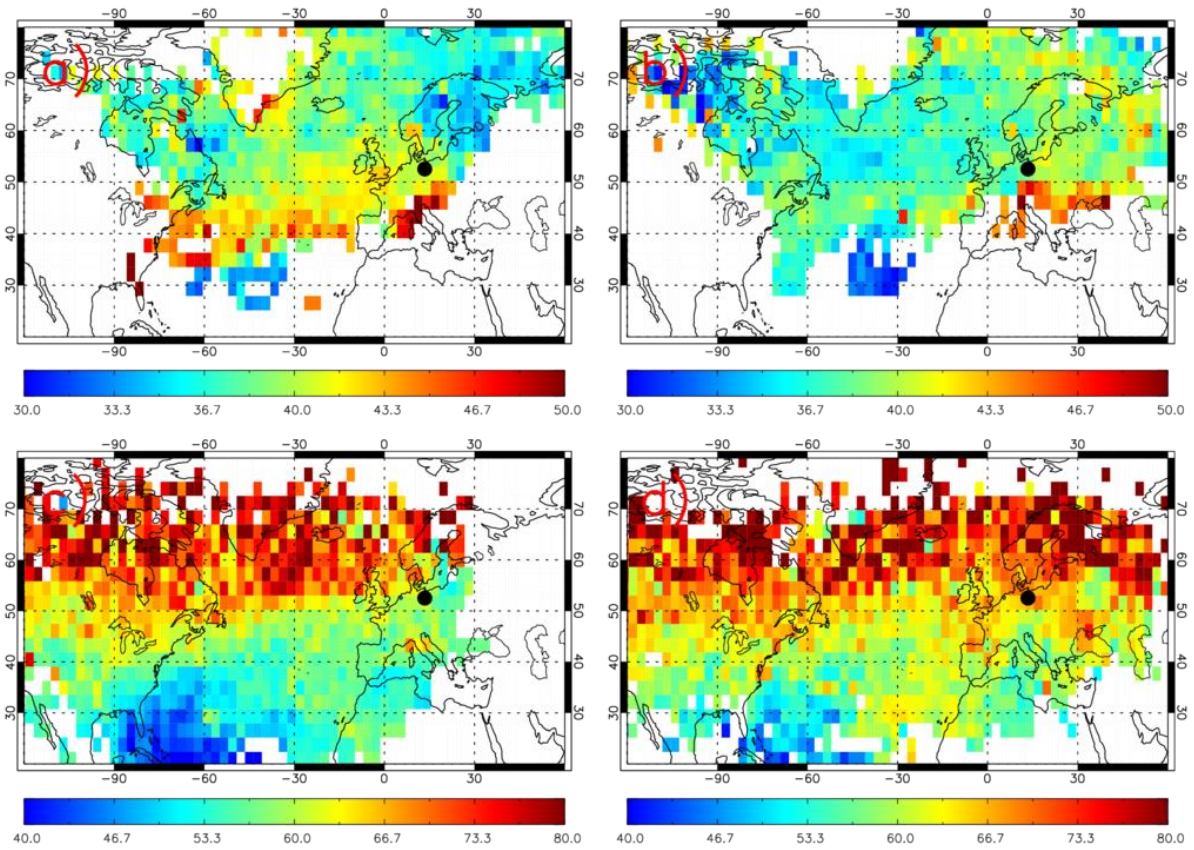

463

464

**Figure S17:** ROTRAJ back-trajectories (10 days) released from Berlin (May-August), weighted by the average TOMCAT  $O_3$  (ppbv) concentration along each trajectory path, gridded onto the TOMCAT horizontal resolution for a) at the surface in 2017, b) at the surface in 2018, c) at approximately 500 hPa in 2017 and d) at approximately 500 hPa in 2018. The black circles represent the location of Berlin where the trajectories were released from.

469

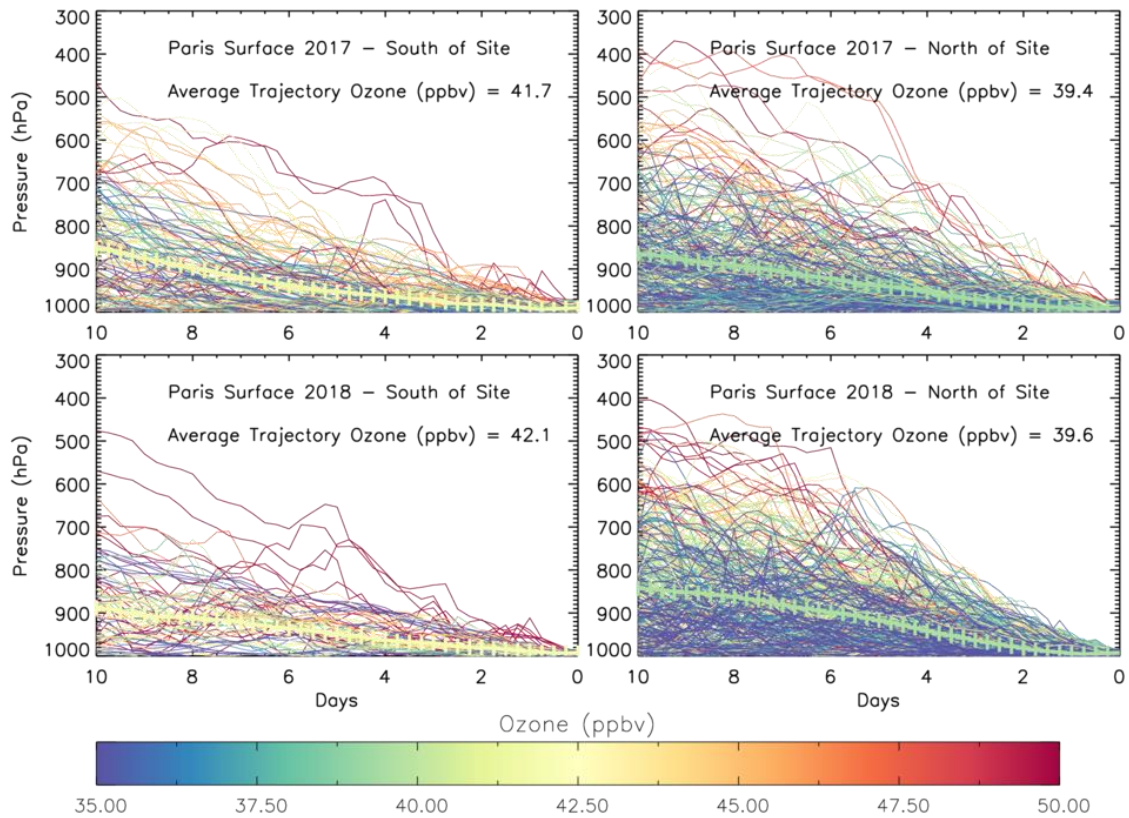

470

471 **Figure S18:** ROTRAJ back-trajectories (10 days), weighted by the average TOMCAT O<sub>3</sub> (ppbv)  
 472 concentration along each trajectory path, plotted as time-pressure profiles, released from Paris near  
 473 the surface for top-left) 2017 originating south of the release point, top-right) 2017 originating north  
 474 of the release point, bottom-left) 2018 originating south of the release point and bottom-right) 2018  
 475 originating north of the release point. The thick cross lines show the average time-pressure profile  
 476 coloured by the average weighted TOMCAT O<sub>3</sub> value.

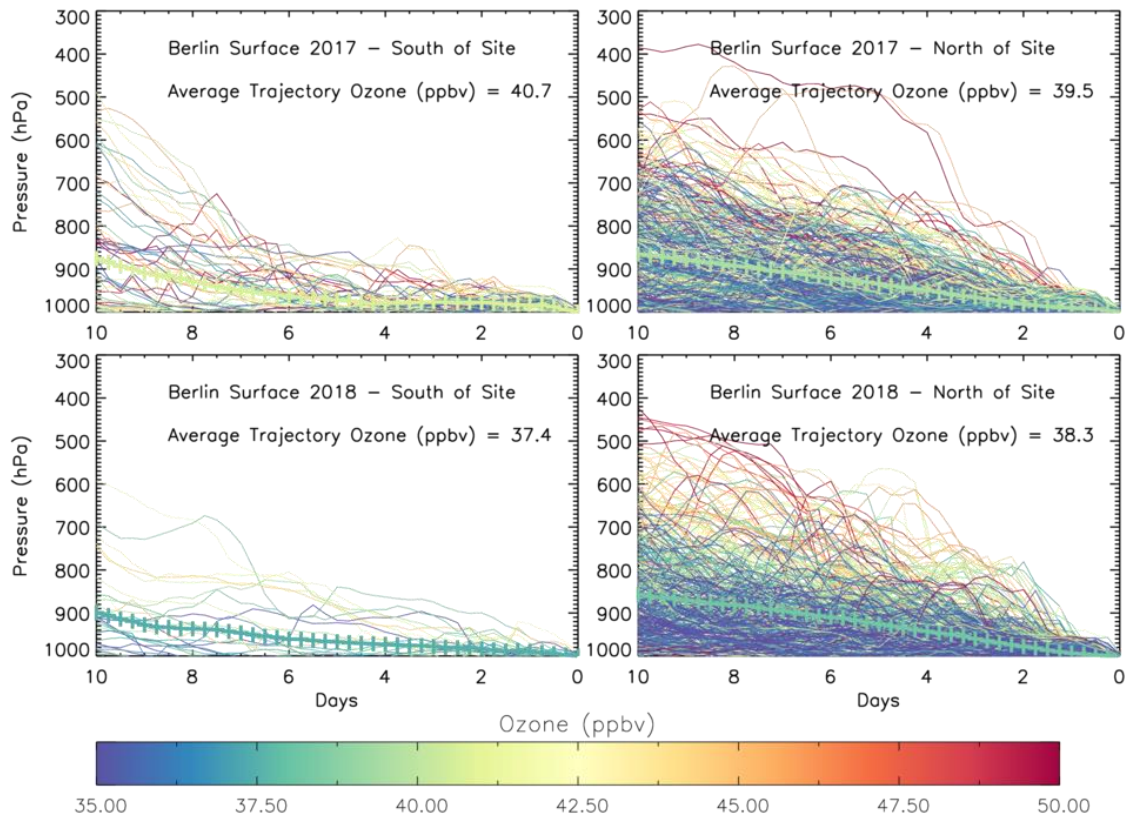

477

478 **Figure S19:** ROTRAJ back-trajectories (10 days), weighted by the average TOMCAT O<sub>3</sub> (ppbv)  
 479 concentration along each trajectory path, plotted as time-pressure profiles, released from Berlin near  
 480 the surface for top-left) 2017 originating south of the release point, top-right) 2017 originating north  
 481 of the release point, bottom-left) 2018 originating south of the release point and bottom-right) 2018  
 482 originating north of the release point. The thick cross lines show the average time-pressure profile  
 483 coloured by the average weighted TOMCAT O<sub>3</sub> value.

484

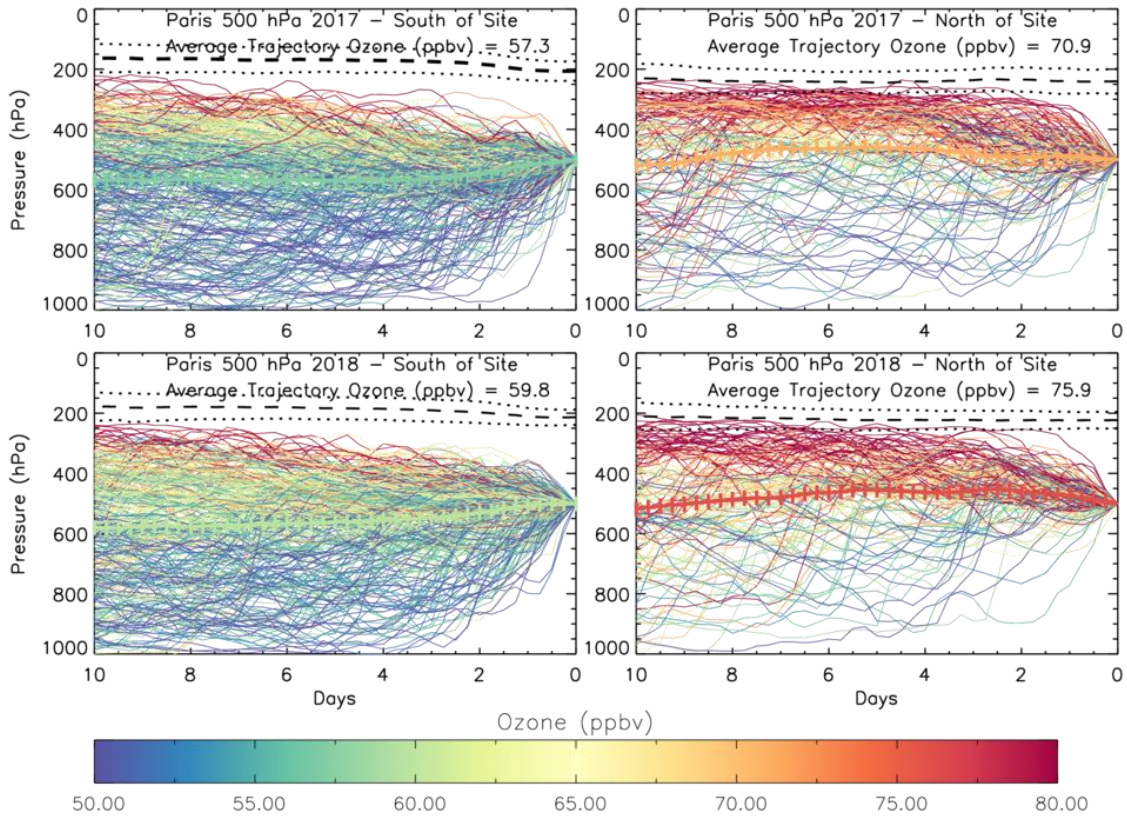

485

486 **Figure S20:** ROTRAJ back-trajectories (10 days), weighted by the average TOMCAT O<sub>3</sub> (ppbv)  
 487 concentration along each trajectory path, plotted as time-pressure profiles, released from Paris at  
 488 500 hPa for top-left) 2017 originating south of the release point, top-right) 2017 originating north of  
 489 the release point, bottom-left) 2018 originating south of the release point and bottom-right) 2018  
 490 originating north of the release point. The thick cross lines show the average time-pressure profile  
 491 coloured by the average weighted TOMCAT O<sub>3</sub> value. The dashed black line presents the average  
 492 tropopause pressure at each time-step of all the trajectories. The dotted black lines show the average  
 493 tropopause pressure  $\pm$  the standard deviation at each time step.

494

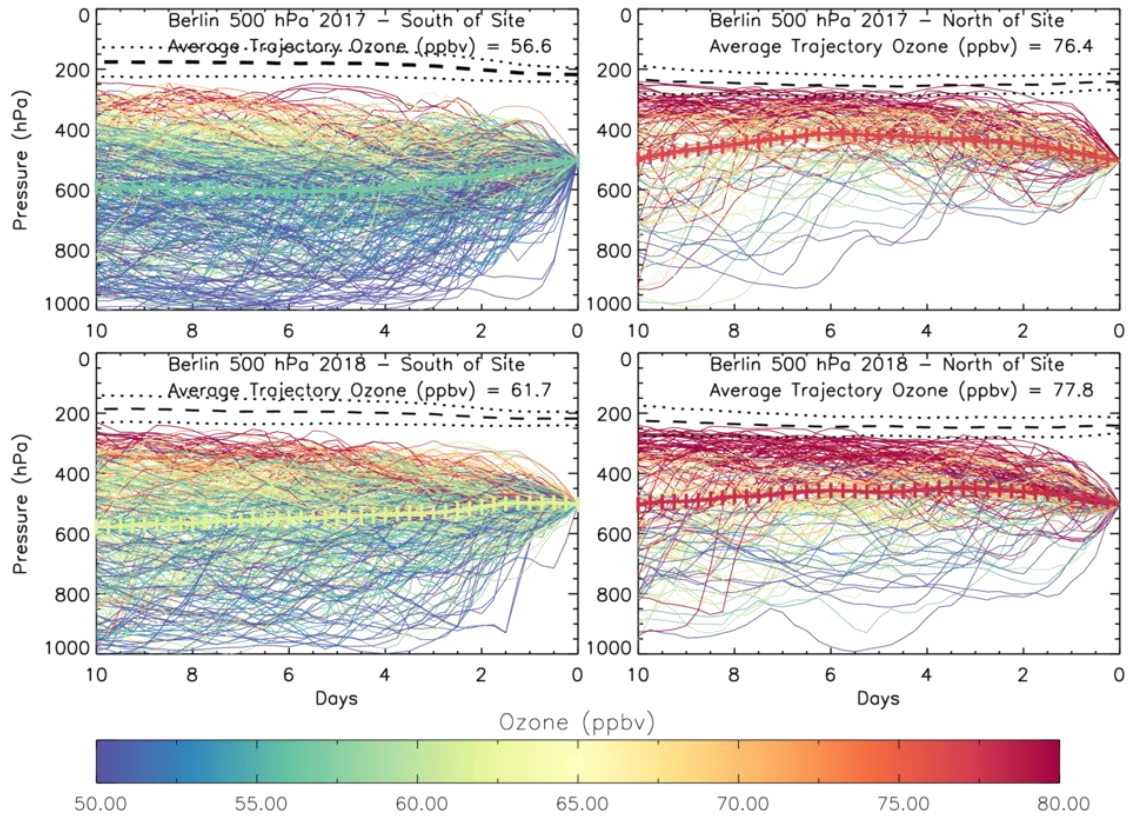

495

496 **Figure S21:** ROTRAJ back-trajectories (10 days), weighted by the average TOMCAT O<sub>3</sub> (ppbv)  
 497 concentration along each trajectory path, plotted as time-pressure profiles, released from Berlin at  
 498 500 hPa for top-left) 2017 originating south of the release point, top-right) 2017 originating north of  
 499 the release point, bottom-left) 2018 originating south of the release point and bottom-right) 2018  
 500 originating north of the release point. The thick cross lines show the average time-pressure profile  
 501 coloured by the average weighted TOMCAT O<sub>3</sub> value. The dashed black line presents the average  
 502 tropopause pressure at each time-step of all the trajectories. The dotted black lines show the average  
 503 tropopause pressure  $\pm$  the standard deviation at each time step.
